1  
2  
3  
4  
5  
6  
7  
8  
9  
10  
11  
12  
13  
14  
15  
16  
17  
18  
19  
20  
21  
22  
23  
24

## **An anti-CRISPR protein induces strong non-specific DNA binding activity in a CRISPR-Cas complex**

Wang-Ting Lu<sup>a</sup>, Chantel N. Trost<sup>b</sup>, Hanna Müller-Esparza<sup>c</sup>, Lennart Randau<sup>c,d</sup> and Alan R. Davidson<sup>a,b,1</sup>

<sup>a</sup>Department of Biochemistry and <sup>b</sup>Department of Molecular Genetics, University of Toronto, Toronto, Canada, <sup>c</sup>Faculty of Biology, University of Marburg, Germany, <sup>d</sup>Loewe Center for Synthetic Microbiology (SYNMIKRO), Germany.

<sup>1</sup>To whom correspondence may be addressed: [alan.davidson@utoronto.ca](mailto:alan.davidson@utoronto.ca)

**Key Words:** CRISPR-Cas; anti-CRISPR; non-specific DNA binding; phage

25

26

27 **ABSTRACT**

28 Phages and other mobile genetic elements express anti-CRISPR proteins (Acrs) to protect their  
29 genomes from destruction by CRISPR-Cas systems. Acrs usually block the ability of CRISPR-  
30 Cas systems to bind or cleave their nucleic acid substrates. Here, we investigate an unusual Acr,  
31 AcrIF9, that induces a gain-of-function to a type I-F CRISPR-Cas (Csy) complex, causing it to  
32 bind strongly to DNA that lacks both a PAM sequence and sequence complementarity. We show  
33 that specific and non-specific dsDNA compete for the same site on the Csy:AcrIF9 complex with  
34 rapid exchange, but specific ssDNA appears to still bind through complementarity to the CRISPR  
35 RNA. We also demonstrate that induction of non-specific DNA-binding is a conserved property  
36 of diverse AcrIF9 homologues, implying that this activity contributes the biologically relevant  
37 function of this Acr family. AcrIF9 provides another example of the surprising variety of  
38 mechanisms by which Acrs inhibit CRISPR-Cas systems.

39

40

41

42

43

44

## 45 INTRODUCTION

46 Clustered Regularly Interspaced Short Palindromic Repeats (CRISPR) and CRISPR-associated  
47 (Cas) proteins together represent an adaptive mechanism employed by many species of bacteria  
48 and archaea to destroy potentially harmful mobile genetic elements (MGEs), such as phages  
49 (Bondy-Denomy & Davidson, 2014; Makarova et al., 2020; Makarova, Wolf, & Koonin, 2018).  
50 CRISPR arrays are comprised of repeated DNA sequences interspersed with non-repeating DNA  
51 spacer sequences. Spacer DNA is often identical to MGE sequences. These arrays are transcribed  
52 and processed into CRISPR (cr) RNAs, comprised of one repeat and one spacer, that form  
53 complexes with Cas proteins. Using the spacer sequence as a guide, CRISPR-Cas complexes  
54 specifically bind DNA or RNA and mediate subsequent nucleolytic destruction of the targeted  
55 nucleic acid. CRISPR-Cas systems provide adaptive immunity against foreign DNA as segments  
56 of newly encountered MGEs can be incorporated into CRISPR arrays in the form of new spacers,  
57 providing defence against subsequent encounters with the same MGE.

58 CRISPR-Cas systems are tremendously diverse with 33 distinct subtypes distributed among 6  
59 different types (Makarova et al., 2020). Here, we focus on the type I-F system, which is found  
60 widely in *Proteobacteria*. The type I-F CRISPR-Cas complex, which is known as the Csy  
61 complex, comprises a 60 nucleotide (nt) crRNA with one molecule of Cas6f bound to the 3'-  
62 hairpin formed by the repeat sequence followed by 6 molecules of Cas7f bound to the 32 nt  
63 spacer (van Duijn et al., 2012; Wiedenheft et al., 2011). A complex of Cas5f and Cas8f are  
64 bound to another portion of the repeat sequence known as the handle, which lies at the 5'-end of  
65 the crRNA (Chowdhury et al., 2017; Guo et al., 2017; Rollins et al., 2019). Binding of dsDNA  
66 targets is initiated by Cas8f recognition of the protospacer adjacent motif (PAM) and subsequent  
67 separation of the DNA strands. Known as R-loop formation, this strand separation allows for  
68 hydrogen-bonding between the spacer region of the crRNA and the target strand of the DNA.  
69 Large conformation changes in the Csy complex occurring upon target DNA-binding lead to  
70 exposure of a Cas8f domain that recruits Cas3, the helicase-nuclease that mediates processive  
71 degradation of the targeted DNA (Rollins et al., 2019).

72 Our group discovered the first phage-encoded inhibitors of a CRISPR-Cas system, describing  
73 five families of anti-CRISPR proteins (Acrs) that blocked the activity of the type I-F system of  
74 *Pseudomonas aeruginosa* (*Pae*) (Bondy-Denomy, Pawluk, Maxwell, & Davidson, 2013). Since  
75 then, more than 60 families of Acrs have been described that act against many different types of  
76 CRISPR-Cas systems (Bondy-Denomy et al., 2018). Mechanistic and structural studies on Acrs  
77 have provided new insights into how CRISPR-Cas systems function and have illustrated the  
78 many fascinating ways by which small proteins can inhibit large protein-RNA complexes  
79 (Athukoralage et al., 2020; Bondy-Denomy et al., 2015; Davidson et al., 2020; Dong et al., 2019;  
80 Guo et al., 2017; Harrington et al., 2017; Wang et al., 2016). In addition, a growing number of  
81 biotechnological applications for Acrs are being developed (Marino, Pinilla-Redondo, Csorgo, &  
82 Bondy-Denomy, 2020; Nakamura et al., 2019; F. Zhang, Song, & Tian, 2019).

83 Despite numerous studies on Acr mechanisms, detailed biochemical and structural investigations  
84 have been carried out on only three Acrs specific to the I-F system (Bondy-Denomy et al., 2015;  
85 Chowdhury et al., 2017; Guo et al., 2017; Wang et al., 2016). Since these characterized Acrs  
86 each function through distinct mechanisms, we reasoned that the study of additional I-F Acrs  
87 would reveal new means of inhibition. To this end, we chose to investigate the AcrIF9 family,  
88 which is one of the largest and most diverse families of I-F Acrs (Pawluk et al., 2016). In a  
89 recent structural study on the Csy complex bound to AcrIF9 (Csy:F9), we and our collaborators

90 found that this complex binds to dsDNA in a non-specific manner, requiring neither a PAM nor  
91 complementarity to the crRNA (Hirschi et al., 2020). Here, we have utilized a variety of  
92 biochemical approaches to characterize and understand this surprising property of the Csy:F9  
93 complex. This work corroborates the structural studies previously performed on AcrIF9 (Hirschi  
94 et al., 2020; K. Zhang et al., 2020), and illuminates the unique features of this anti-CRISPR.

## 95 **RESULTS**

### 96 **AcrIF9 binds to Cas7f at a site overlapping with AcrIF1**

97 Genes encoding four members of the AcrIF9 family found in strains of *Vibrio parahaemolyticus*  
98 (*Vpa*), *Proteus penneri* (*Ppe*), *Aggregatibacter actinomycetemcomitans* (*Aac*), and *Xanthomonas*  
99 *fragariae* (*Xfr*) were synthesized and expressed in *Pae* (Fig. S1A). All four homologs showed  
100 robust inhibition of the *Pae* type I-F CRISPR-Cas system (Fig. S1B). Expression of 6xHis-  
101 tagged versions of each homolog in *E. coli* followed by Ni-NTA purification showed that the  
102 homolog from *Ppe* was most suitable for further biochemical analysis due to its displaying the  
103 highest expression level and solubility. All subsequent studies were performed with this protein  
104 except where noted.

105 Two different recently solved cryo-EM structures of AcrIF9-bound Csy (Csy:F9) complex  
106 revealed a stoichiometry of two AcrIF9 monomers per complex (Hirschi et al., 2020; K. Zhang et  
107 al., 2020). Remarkably, the binding sites of AcrIF9 overlap very closely with those of the  
108 previously characterized anti-CRISPR, AcrIF1 (Bondy-Denomy et al., 2015; Chowdhury et al.,  
109 2017). To confirm that AcrIF9 and AcrIF1 occupy overlapping sites on Cas7f, we conducted a  
110 competitive binding experiment. Untagged AcrIF9 was added to Csy complex containing 6xHis-  
111 tagged Cas7f that was pre-saturated with untagged AcrIF1. Purification of Acr-bound Csy  
112 complexes using Ni-NTA chromatography showed that the prior addition of AcrIF1 completely  
113 blocked the binding AcrIF9 (Fig. S2). By contrast, prior addition of AcrIF9 or AcrIF1 to the Csy  
114 complex did not impede the binding of untagged AcrIF2, which binds to Cas8f (Bondy-Denomy  
115 et al., 2015; Chowdhury et al., 2017). These results confirm that AcrIF9 and AcrIF1 bind to the  
116 same binding site on Cas7f.

### 117 **AcrIF9 abolishes the DNA binding specificity of the Csy complex**

118 Since AcrIF9 and AcrIF1 share binding sites on the Csy complex, it was expected that they  
119 would have the same effect on the Csy complex. AcrIF1 sterically blocks the hybridization of  
120 target DNA to the crRNA, thus strongly inhibiting the binding of both dsDNA and ssDNA (Guo  
121 et al., 2017). However, previous work indicated that AcrIF9 induced the Csy complex to bind  
122 DNA non-specifically, a property not observed for AcrIF1 (Hirschi et al., 2020). To investigate  
123 this surprising aspect of AcrIF9, Electrophoretic Mobility Shift Assays (EMSAs) were used to  
124 assess the effect of AcrIF9 on the DNA-binding activity of the Csy complex. As shown  
125 previously, binding of the Csy complex to a 50 bp dsDNA fragment containing a sequence  
126 matching the crRNA spacer and an appropriate Protospacer Adjacent Motif (PAM) causes a  
127 large change in the mobility of the fragment in a polyacrylamide gel ((Bondy-Denomy et al.,  
128 2015), Fig. 1A). Addition of AcrIF9 to the Csy complex did not abrogate dsDNA binding, and  
129 the shifted band displayed a slower mobility and was smeared (Fig. 1A). By contrast, a Csy  
130 complex bound to AcrIF1 (Csy:F1) displayed no dsDNA-binding ability, as was previously  
131 shown (Bondy-Denomy et al., 2015). When specific ssDNA was used as a binding substrate, the  
132 Csy:F9 complex bound as well as the Csy complex alone; again contrasting with the Csy:F1

133 complex that displayed greatly reduced ssDNA binding (Fig. 1 *A*). Thus, AcrIF9 and AcrIF1  
134 elicit very different effects on the DNA-binding activity of the Csy complex despite binding at  
135 overlapping sites on Cas7f.

136 The smearing of the dsDNA band bound to Csy:F9 suggested that this complex may not  
137 recognize a specific site on the DNA. To test this idea, we performed a similar EMSA  
138 experiment using a 50 bp non-specific dsDNA sequence (dsDNA<sub>NS</sub>) that possesses the same base  
139 composition as the specific target DNA, but the sequence is randomized. The PAM sequence is  
140 also absent. While the Csy complex on its own displayed no affinity for dsDNA<sub>NS</sub>, Csy:F9  
141 displayed robust binding activity (Fig. 1*B*). Notably, binding of Csy:F9 to dsDNA<sub>NS</sub> resulted in  
142 the a similar supershifted and smeared band as was seen in the experiments with the specific  
143 target DNA (dsDNA<sub>SP</sub>). Csy:F9 also bound to non-specific ssDNA (ssDNA<sub>NS</sub>). AcrIF9 alone  
144 showed no binding to dsDNA (Fig. S3). Titration experiments where concentrations of unbound  
145 Csy or Csy:F9 were incrementally increased indicated that the affinity of Csy:F9 for dsDNA<sub>NS</sub>  
146 was similar to its affinity for dsDNA<sub>SP</sub> and to the affinity of unbound Csy for dsDNA<sub>SP</sub>. In each  
147 of these cases, the DNA was mostly bound at a complex concentration of 1000 nM (Fig. 1*C*). It  
148 should be noted that the EMSA results involving AcrIF9 presented here differ in appearance  
149 from those previously published (Hirschi et al., 2020). These previous assays were run under  
150 different conditions. In addition, these assays used a constant concentration of both DNA and  
151 Csy complex, only increasing the concentration of AcrIF9. Here, the Csy:F9 complexed was pre-  
152 formed through co-expression and purified as a complex. Increasing concentrations of the pre-  
153 formed complex were added to the reactions.

## 154 **Multiple Csy:F9 complexes bind to non-specific DNA**

155 To further investigate the DNA-binding properties of Csy:F9, we used a fluorescence  
156 polarization (FP) assay (Anderson, Larkin, Guja, & Schildbach, 2008). The binding of  
157 fluorescently labeled DNA to the 350 kD Csy complex markedly reduces its tumbling rate  
158 causing an increased FP signal. Thus, the binding of DNA to Csy and Csy:F9 could be  
159 quantitated by monitoring the FP signal. Consistent with the EMSA results, the binding of  
160 Csy:F9 to both dsDNA<sub>NS</sub> and dsDNA<sub>SP</sub> was readily detected and occurred at Csy complex  
161 concentrations within the same range as required for binding of dsDNA<sub>SP</sub> to the Csy complex on  
162 its own (Fig. 2*A*). Dissociation constants ( $K_d$  values) calculated from these data showed the Csy  
163 complex binding dsDNA<sub>SP</sub> with a  $K_d$  of  $17 \pm 6$  nM while Csy:F9 bound dsDNA<sub>SP</sub> and dsDNA<sub>NS</sub>  
164 with apparent  $K_d$  values of  $96 \pm 33$  nM and  $73 \pm 23$  nM, respectively. These values were  
165 calculated assuming formation of a 1:1 Csy:DNA complex, which is likely not the case for  
166 Csy:F9 as is discussed below; thus, we use the term “apparent  $K_d$ ” and quote these values only to  
167 provide an estimate of the binding strength. Notably, the FP signal measured for the Csy:F9  
168 complex binding to dsDNA<sub>NS</sub> at saturation was nearly double that seen when dsDNA<sub>SP</sub> was  
169 bound by Csy alone, suggesting that more than one molecule of Csy:F9 may be binding to each  
170 molecule of dsDNA<sub>NS</sub>. Supporting this idea, the Csy:F9 EMSA titration experiments described  
171 above (Fig. 1*C*) showed a gradual increase in size of the shifted band in the presence of pre-  
172 saturating concentrations of the Csy:F9 complex. This behavior is likely the result of additional  
173 molecules of Csy:F9 binding to the DNA as the concentration of the complex increases.

174 To directly address the effect of multiple Csy complexes binding to a single DNA molecule, we  
175 designed a 60 bp dsDNA target sequence containing two 24 bp complementary binding sites for  
176 the Csy complex, each with their own PAMs and including the seed region (henceforth called  
177 dsDNA<sub>2X</sub>, Fig. 2*B*). A 24 nt ssDNA molecule complementary to the 5' end of the crRNA was

178 previously shown to bind strongly to the Csy complex (Bondy-Denomy et al., 2015). EMSAs  
179 with dsDNA<sub>2X</sub> revealed the formation of two distinct bands when mixed with the Csy complex at  
180 high concentrations (Fig. 2B). The more slowly moving band presumably resulted from the  
181 binding of two Csy complexes to one molecule of dsDNA. This band runs with a mobility  
182 similar to the band observed when the Csy:F9 complex is mixed with the dsDNA<sub>SP</sub> or dsDNA<sub>NS</sub>  
183 molecules tested above (Fig. 1C). Binding of the Csy complex to dsDNA<sub>2X</sub> in FP experiments  
184 caused a doubling of the FP signal compared to binding of dsDNA<sub>SP</sub>, resulting in a signal level  
185 similar to that seen when the Csy:F9 complex binds to dsDNA<sub>SP</sub>, dsDNA<sub>NS</sub>, or dsDNA<sub>2X</sub> (Fig.  
186 2A, 2C). A final 60 bp molecule, called dsDNA<sub>1X</sub>, was synthesized that contained one 24 bp  
187 complementary binding site for the Csy complex at one end followed by a random sequence that  
188 could act as a non-specific binding site for Csy:F9 (Fig. 2D). We first saturated dsDNA<sub>1X</sub> with  
189 the Csy complex, resulting in a single shifted band on the EMSA gel. Subsequent addition of  
190 Csy:F9 led to a stepwise slowing of the DNA mobility as the concentration of Csy:F9 was  
191 increased (Fig. 2D). These data further demonstrate that the slowed mobility of the Csy:F9:DNA  
192 complex is the result of multiple complexes binding to a single molecule of DNA.

### 193 **Csy:F9 binds dsDNA<sub>NS</sub> and dsDNA<sub>SP</sub> at an overlapping site, but ssDNA<sub>SP</sub> is** 194 **bound differently**

195 The surprising ability of Csy:F9 to bind dsDNA<sub>NS</sub> may involve a distinct surface on the Csy  
196 complex that is not normally engaged in DNA-binding. We performed competition EMSA  
197 experiments to determine whether dsDNA<sub>NS</sub> and dsDNA<sub>SP</sub> compete for the same binding site on  
198 Csy:F9. The Csy and Csy:F9 complexes were first pre-saturated with FAM-labeled dsDNA<sub>SP</sub>  
199 and then increasing concentrations of Cy5-labeled dsDNA<sub>NS</sub> were added. In reactions with Csy  
200 complex alone, addition of dsDNA<sub>NS</sub> even at a 4-fold excess caused no reduction in binding to  
201 dsDNA<sub>SP</sub> (Fig. 3A, left panel). By contrast, addition of dsDNA<sub>NS</sub> to Csy:F9 led to increased  
202 levels of free dsDNA<sub>SP</sub>, even when the two types of DNA were present at equal concentrations  
203 (Fig. 3A, left panel). Moreover, most of the dsDNA<sub>SP</sub> was displaced at a dsDNA<sub>NS</sub>:dsDNA<sub>SP</sub>  
204 ratio of 4:1 (Fig. 3A, left panel). Viewing the binding of dsDNA<sub>NS</sub> by illuminating the same gel  
205 with light at 635 nm (absorption wavelength for Cy5) showed that no dsDNA<sub>NS</sub> was bound to the  
206 Csy complex alone but Csy:F9 bound robustly to dsDNA<sub>NS</sub> even at its lowest concentration (Fig.  
207 3A, right panel). Our observation that dsDNA<sub>NS</sub> readily competes dsDNA<sub>SP</sub> off of Csy:F9,  
208 implies that dsDNA<sub>NS</sub> and dsDNA<sub>SP</sub> bind to an overlapping site.

209 Binding competition experiments were also conducted using FP. Csy or Csy:F9 complexes were  
210 pre-saturated with labeled DNA and then challenged with increasing concentrations of non-  
211 labeled DNA. If the added non-labeled DNA competed for the same binding site as the labeled  
212 DNA, then a decrease in FP signal was expected as the labeled DNA would be competed off of  
213 the complex. In the case of the Csy:F9 complex, it can be seen that dsDNA<sub>NS</sub> and dsDNA<sub>SP</sub>  
214 competed with each other readily and to a similar degree regardless of whether the complex was  
215 pre-saturated with dsDNA<sub>SP</sub> or dsDNA<sub>NS</sub> (Fig. 3B). By contrast, binding of the Csy complex to  
216 dsDNA<sub>SP</sub> was competed negligibly by dsDNA<sub>NS</sub> even at an 8-fold excess. Notably, the addition  
217 of excess levels dsDNA<sub>SP</sub> to the pre-formed Csy:dsDNA<sub>SP</sub> complex resulted in little loss of FP  
218 signal (Fig. 3B), implying that the off-rate of dsDNA<sub>SP</sub> from Csy is considerably longer than the  
219 30 min incubation period after competitor DNA was added.

220 To directly address the kinetics of dsDNA binding to Csy:F9, increasing concentrations of  
221 unlabeled dsDNA<sub>NS</sub> were added to a complex pre-saturated with labeled dsDNA<sub>SP</sub> and the

222 dissociation of the labeled DNA was monitored over time using FP (Fig. S4A). Due to the  
223 experimental set-up, we were unable to measure time points shorter than 5 min. It can be seen  
224 that little change in signal was observed between the 5 min and 30 min time points, indicating  
225 that the dsDNA<sub>SP</sub> was completely dissociated within 5 min. The same dissociation kinetics were  
226 observed when the Csy:F9 complex was saturated with labeled dsDNA<sub>NS</sub> and competed with  
227 unlabeled dsDNA<sub>SP</sub>. By contrast, dsDNA<sub>SP</sub> bound to the Csy complex alone was not competed  
228 off at all by dsDNA<sub>NS</sub> after 30 min (Supp Fig. 4C). Overall, these experiments show that bound  
229 dsDNA dissociates quickly from Csy:F9 complex, while dsDNA bound specifically to the Csy  
230 complex dissociates slowly.

231 Competition EMSA experiments conducted with ssDNA presented a different picture. While  
232 dsDNA<sub>SP</sub> and dsDNA<sub>NS</sub> readily competed for an overlapping site on Csy:F9, ssDNA<sub>NS</sub> was  
233 unable to compete ssDNA<sub>SP</sub> off of the Csy:F9 complex (Fig. 3C). This result was similar to that  
234 obtained in testing the Csy complex where ssDNA<sub>SP</sub> was also not competed by ssDNA<sub>NS</sub> (Fig.  
235 3C). Competition experiments monitored by FP corroborated the EMSA results, showing that  
236 ssDNA<sub>SP</sub> binding to Csy:F9 or Csy alone was not competed off by ssDNA<sub>NS</sub>, but ssDNA<sub>NS</sub> was  
237 competed off by ssDNA<sub>SP</sub> to some extent (Fig. 3D). The ability of ssDNA<sub>SP</sub> to only partially  
238 displace ssDNA<sub>NS</sub> suggests that these molecules are not binding to completely overlapping sites.  
239 These data indicate that in contrast to the case with dsDNA, Csy:F9 binds ssDNA<sub>SP</sub> considerably  
240 more strongly than ssDNA<sub>NS</sub>. Using EMSAs, we also observed minimal displacement of pre-  
241 saturated ssDNA<sub>SP</sub> when competed with increasing concentrations of dsDNA<sub>SP</sub> from the Csy:F9  
242 complex (Fig. S5). Overall, these data demonstrate that ssDNA<sub>SP</sub> is unique in its stronger binding  
243 to Csy:F9 as compared to any other of the DNA molecules tested, implying that Csy:F9 retains  
244 the ability to distinguish specific from non-specific ssDNA.

### 245 **Cas8f is involved in the binding of dsDNA<sub>NS</sub> by Csy:F9**

246 The structure of AcrIF9 shows interaction with both Cas7f and Cas8f (K. Zhang et al., 2020), a  
247 critical subunit responsible for the initial nonspecific scanning of DNA, PAM recognition, and  
248 subsequent strand separation (Chowdhury et al., 2017; Guo et al., 2017). We hypothesized that  
249 this subunit may play a role in the unusual properties of Csy:F9. AcrIF2 is a Cas8f-binding anti-  
250 CRISPR that can bind to Csy in the presence of AcrIF9 (Fig. S2). The Csy:F2 complex displayed  
251 greatly reduced dsDNA<sub>SP</sub> binding as has been previously shown (Bondy-Denomy et al., 2015)  
252 and did not bind to dsDNA<sub>NS</sub> (Fig. 4A). Strikingly, addition of AcrIF2 also drastically reduced  
253 the ability of Csy:F9 to bind both dsDNA<sub>SP</sub> and dsDNA<sub>NS</sub>. This result implied that Cas8f is  
254 playing a role in the non-specific dsDNA binding activity of Csy:F9 even though AcrIF9 binds  
255 to Cas7f.

256 After Cas8f recognizes the PAM, this subunit destabilizes the DNA duplex, leading to base  
257 pairing of one DNA strand to the crRNA and to the formation a single-stranded loop, referred to  
258 as the R-loop, by the other strand. During this process of PAM recognition, Cas8f undergoes a  
259 helical rotation to expose a positively charged channel that binds and stabilizes the R-loop  
260 (Rollins et al., 2019). The R-loop binding channel is not sequence specific, as it must bind to a  
261 DNA sequence that matches any spacer. To address the possibility that a portion of the non-  
262 specific R-loop binding channel might be involved in the non-specific DNA binding activity of  
263 Acr:F9, we constructed a mutant Cas8f subunit in which 8 Arg residues lining the R-loop  
264 binding channel were replaced with Glu  
265 (R207E/R219E/R258E/R259E/R293E/R299E/R302E/R306E). The Csy complex including this  
266 Cas8f mutant, which we refer to as CsyRE, displayed reduced binding activity to dsDNA<sub>SP</sub> as

267 would be expected since this mutant is impaired in its ability to maintain strand separation (Fig.  
268 4B). Interestingly, the CsyRE:F9 complex also displayed markedly reduced binding of both  
269 dsDNA<sub>SP</sub> and dsDNA<sub>NS</sub> (Fig. 4B) as compared to the wild-type Csy:F9 complex (Fig. 1C). This  
270 result further implicates Cas8f in the non-specific DNA binding activity of Csy:F9.

## 271 **Non-Specific DNA binding is a conserved property of Csy:F9 complexes**

272 The unusual properties of the Csy:F9 complex led us to question whether this was a conserved  
273 feature of this anti-CRISPR or an unusual coincidence occurring with one particular combination  
274 of AcrIF9 homologue and Csy complex. To address this issue, we tested a homologue of AcrIF9  
275 from *A. actinomycetemcomitans* that is only 33% identical to the homologue from *P. penneri*  
276 used in our other experiments, but still strongly inhibits the type I-F CRISPR-Cas system of *P.*  
277 *aeruginosa* (Fig. S1B). Assessment of the DNA binding activity of a Csy:F9<sub>Aac</sub> complex by  
278 EMSA showed that it also bound to dsDNA<sub>NS</sub> in a similar manner as the Csy:F9<sub>Ppe</sub> complex  
279 tested above, including the smeared supershifted band (Fig. S6).

280 To further highlight the universality of Csy:F9 behavior, we assessed the activity of the AcrIF9  
281 homologue from *V. parahaemolyticus* (72% identical to F9<sub>Ppe</sub>) against the type I-F CRISPR-Cas  
282 system from *Shewanella baltica* (*Sba*, Cas7f 57% identical to Cas7f of *P. aeruginosa*). Using an  
283 *in vivo* plasmid transformation assay, it was shown that the *S. baltica* system was completely  
284 inhibited by AcrIF9<sub>Vpa</sub>, as strains expressing the anti-CRISPR protein and the complex exhibited  
285 transformation efficiencies similar to those carrying a deficient nuclease (Cas2-3 HD domain  
286 mutant, Fig. S7A). The DNA binding properties of Csy<sub>Sba</sub>:F9<sub>Vpa</sub> were investigated using Bio-  
287 layer Interferometry (BLI). In this approach, biotinylated dsDNA target oligonucleotides were  
288 immobilized on a streptavidin-coated bio-sensor. The Csy<sub>Sba</sub> complex was then flowed into the  
289 cell and the shift in wavelength of reflected light was measured over time to determine the on-  
290 rate ( $k_{on}$ ) of the reaction. The off-rate ( $k_{off}$ ) was determined by flowing buffer into the cell after  
291 the binding reaction reached equilibrium. The BLI experiments showed that Csy<sub>Sba</sub> bound  
292 dsDNA<sub>sp</sub>, but showed weak binding to dsDNA<sub>NS</sub>, similar to the binding of AcrIF9<sub>Vpa</sub> alone (Fig.  
293 5A, B; Fig. S7B). By contrast, the Csy<sub>Sba</sub>:F9<sub>Vpa</sub> complex was able to bind both dsDNA<sub>SP</sub> and  
294 dsDNA<sub>NS</sub> (Fig. 5A, B; Fig. S7B). For the specific target, the Csy<sub>Sba</sub>:F9<sub>Vpa</sub> complex bound with  
295 14-fold faster  $k_{on}$  than the Csy<sub>Sba</sub> complex alone ( $130050 \pm 3674.5 \text{ M}^{-1}\text{s}^{-1}$  vs.  $9023 \pm 860.5 \text{ M}^{-1}\text{s}^{-1}$   
296  $^1$ ), and also displayed an 8-fold faster  $k_{off}$  ( $0.01805 \pm 0.0003 \text{ s}^{-1}$  vs.  $0.0022675 \pm 0.0016 \text{ s}^{-1}$ ).

## 297 **AcrIF1 and AcrIF9 have different effects on Csy complex stability**

298 The cryo-EM structure of AcrIF9 bound to the Csy complex shows that its binding site overlaps  
299 very closely with that of AcrIF1 (Fig. 6A) (Chowdhury et al., 2017; Guo et al., 2017), and the  
300 overall conformation of the Csy:F9 and Csy:F1 complexes are very similar. However, in contrast  
301 to the Csy:F9 complex, the Csy:F1 complex displays no non-specific DNA binding activity and  
302 is also completely unable to bind specific dsDNA or ssDNA (Bondy-Denomy et al., 2015).  
303 These activity differences may result from differences in the conformational flexibility of these  
304 two complexes. As a means to interrogate the overall flexibility of the Csy complex alone and in  
305 combination with anti-CRISPRs, we treated these complexes with the protease Thermolysin at  
306 55 °C. We chose this treatment because appreciable digestion of Cas7f was not observed at lower  
307 temperatures using Trypsin. Thermolysin treatment of the unbound Csy complex resulted in  
308 rapid degradation of Cas8f and Cas5f and very little disappearance of the band corresponding to  
309 Cas6f (Fig. S8A). The band corresponding to Cas7f exhibited intermediate behavior, decreasing  
310 steadily over the 5, 10, and 15 min timepoints until only a faint band remained at 30 min. While



311 the degradation pattern of Csy:F9 was very similar to the unbound complex (Fig. S8B), the  
312 Csy:F1 complex was considerably more resistant to proteolysis (Fig. S8C). In particular, the  
313 band corresponding to Cas7f was more pronounced at every time point (Fig. 6B) and many more  
314 bands are visible (Fig S8C). We presume that these extra bands are partial degradation products  
315 of Cas7f. A band at the size of AcrIF1 was also visible even after an hour whereas no band  
316 corresponding to AcrIF9 was visible even at 5 min. These data indicate that the interaction of  
317 AcrIF1 with Cas7f imparts substantial conformational stability, resulting in increased resistance  
318 to proteolysis. This stabilization is a property only of AcrIF1 binding even though AcrIF9 binds  
319 to the same interface on Cas7f.

320

## 321 DISCUSSION

322 A striking feature of anti-CRISPRs is their diversity in sequence, structure, and mechanism of  
323 action. Here, we describe the activity of AcrIF9, the first example of an Acr that induces a  
324 CRISPR-Cas system to bind dsDNA independent of sequence complementarity or PAM.  
325 Binding of AcrIF9 to the Csy complex renders it incapable of distinguishing dsDNA<sub>SP</sub> from  
326 dsDNA<sub>NS</sub>, binding each with similar apparent affinity. Furthermore, the strength of the non-  
327 specific DNA-binding induced by AcrIF9 is similar to the specific DNA-binding affinity of the  
328 Csy complex on its own, a remarkable property given that non-specific DNA binding activity  
329 mediated by Csy complex is so weak as to be undetectable in our assays.

330 Our *in vitro* DNA binding experiments clearly show that dsDNA<sub>SP</sub> and dsDNA<sub>NS</sub> compete  
331 equally for the same site on the Csy:F9 complex, indicating that specific hydrogen bonding with  
332 the crRNA is not contributing to the interaction (Fig. 3A, B). The non-specific nature of Csy:F9  
333 DNA binding is also supported by the ability of multiple Csy:F9 complexes to bind one molecule  
334 of DNA resulting in the supershifted complexes seen in EMSA gels and the increased signal seen  
335 in the FP assays (Fig. 1D, 2A). Although the affinity of Csy:F9 for non-specific DNA appears to  
336 be similar to that of the Csy complex alone for specific DNA, Csy:F9 binds to DNA much more  
337 quickly (Fig. 5A, B), but also dissociates more quickly. These properties are consistent with a  
338 reaction driven primarily by electrostatics as would be expected for non-specific DNA binding.  
339 The smeared appearance the Csy:F9:DNA complexes in EMSA gels is likely a result of the  
340 dissociation of these complexes during electrophoresis. The abrogation of the dsDNA binding  
341 activity of Csy:F9 by AcrIF2 or the Cas8f amino acid substitutions (Fig. 4) indicate that Cas8f  
342 forms at least part of the non-specific DNA binding interface. The structure of the Csy:F9  
343 complex shows that some of the positively charged Cas8f residues substituted with Glu in the  
344 CsyRE complex lie close to positively charged residues in AcrIF9 (Fig. 6C). The juxtaposition of  
345 positively charged residues in AcrIF9 and Cas8f may create a unique surface for non-specific  
346 DNA binding. Notably, a loop of Cas8f between residues 222 and 230 is positioned within less  
347 than 3 Å of the AcrIF9.1 molecule (Fig. 6A). This interaction between AcrIF9 and Cas8f, which  
348 is not seen in the Csy:F1 complex, may stabilize a conformation required for non-specific DNA  
349 binding. A recently published cryoEM structure of Csy:F9 bound to DNA indicates a direct  
350 involvement of the positively charged residues of AcrIF9 in binding (Hirschi et al., 2020).  
351 However, further mutagenesis studies coupled with biochemical assays are still required to  
352 corroborate this structural model.

353 Given the distinct effects of AcrIF1 and AcrIF9 on the activity of the Csy complex, it is  
354 surprising that these anti-CRISPRs bind to the Csy complex in such a similar manner. The

355 interactions of both anti-CRISPRs are primarily with one Cas7f subunit to a region known as the  
356 thumb (residues 71-95) and to a loop between residues 250 and 261 (Fig. 6A). They contact  
357 mostly the same residues in these regions even though their sequences and structures are  
358 different. A potentially important distinction between these anti-CRISPRs is that AcrIF1 contacts  
359 residues 251-257 in the neighboring Cas7f subunit forming an additional interface of 275 Å<sup>2</sup>  
360 (Fig. 6A). This same region was unresolved in the Csy:F9 structure, and AcrIF9 makes minimal  
361 contact with adjacent Cas7f subunits. The bridging contacts between Cas7f subunits mediated by  
362 AcrIF1 may explain the increased resistance of Cas7f to proteolysis when bound to this anti-  
363 CRISPR as opposed to AcrIF9 (Fig. 6B). AcrIF1 and AcrIF9 appear to sterically occlude the  
364 crRNA in a similar manner and both would be expected to block all DNA binding. Consistent  
365 with the structure, AcrIF1 does completely inhibit binding of both ssDNA and dsDNA.  
366 However, the ability Csy:F9 to distinguish ssDNA<sub>SP</sub> from ssDNA<sub>NS</sub> (Fig. 3C, D) implies that  
367 complementary base pairing between crRNA and ssDNA can still occur in this complex. This  
368 may due to differences in conformational flexibility between Csy:F9 and Csy:F1 that are not  
369 evident from the cryo-EM structure, but may be reflected in the proteolysis experiment.

370 The non-specific DNA binding activity mediated by AcrIF9 may play an important biological  
371 role, or it could be an adventitious *in vitro* curiosity. Our observation that the highly diverged  
372 AcrIF9<sub>Acc</sub> elicits non-specific dsDNA binding by the *Pae* Csy complex and AcrIF9<sub>Vpa</sub> does the  
373 same when bound to the *Sba* Csy complex demonstrates that this is a conserved property.  
374 Furthermore, an alignment of seven diverse AcrIF9 homologues reveals 4 completely conserved  
375 positively charged positions (Fig. S1A). The residues at these positions are highly exposed the  
376 Csy:F9 structure. They also interact with DNA in the structure of the Csy:F9:DNA complex  
377 (Hirschi et al., 2020). The 4 other positions in the AcrIF9 alignment that are completely  
378 conserved play key functional roles: one (Ala34) is completely buried in the protein core, two  
379 (Gln38 and Trp54) are buried in the interface with Cas7f and one (Tyr5) interacts with Cas8f.  
380 Substitutions at Gln38 and Tyr5 abrogate AcrIF9 function (Makarova et al., 2020; K. Zhang et  
381 al., 2020). Thus, the four surface exposed positively charged positions on AcrIF9 display  
382 unusually high conservation equivalent to functionally crucial positions, implying that these  
383 residues play a role that has been selected for during evolution. By blocking specific recognition  
384 of dsDNA and inducing non-specific DNA binding, AcrIF9 may increase its effectiveness by  
385 sequestering Csy complexes in non-productive interactions with bulk DNA within the cell. These  
386 non-specific interactions would likely not lead to DNA cleavage because without proper  
387 hybridization to the crRNA, the Csy complex is unable to undergo the correct conformational  
388 changes required for Cas3 recruitment to the Cas8f subunit (Rollins et al., 2019). Supporting this  
389 idea, AcrIF9 blocks *in vitro* cleavage activity mediated by the Csy complex and Cas3 (K. Zhang  
390 et al., 2020). Overall, AcrIF9 and its homologues appear to increase their effectiveness by both  
391 blocking dsDNA from base pairing with the crRNA to induce Cas3-mediated DNA cleavage,  
392 and by diverting the Csy complex away from the target DNA through non-specific DNA  
393 binding. The unique nature of AcrIF9 inhibition may partially explain the widespread  
394 distribution of members of this Acr family and their ability to block diverse type I-F systems  
395 (Pawluk et al., 2016). Interestingly, another very widespread Acr, AcrIIA11, possesses DNA  
396 binding activity on its own, and this activity is increased in the presence of Cas9 (Forsberg et al.,  
397 2019).

398 In conclusion, we have shown that AcrIF9 possesses the remarkable ability to convert the  
399 normally highly specific dsDNA binding activity of the Csy complex into a completely non-  
400 specific binding activity that is, nevertheless, still very strong. The potential to become a strong

401 non-specific DNA binding complex may be inherent in all dsDNA binding CRISPR-Cas systems  
402 as they all must form non-specific interactions with the single strand of DNA that is looped out  
403 (the R-loop) upon hybridization of the target strand to the crRNA. In the case of Csy:F9  
404 complex, the surface of Cas8f responsible for R-loop binding appears to be involved in the  
405 stabilization of non-specific DNA interactions. Given the known conformational flexibility of the  
406 Csy complex (Guo et al., 2017), it is possible that AcrIF9 may preferentially stabilize  
407 conformations that expose residues involved in non-specific DNA binding. Further investigation  
408 of AcrIF9 and other Acrs with unexpected activities will provide unique pathways to increase  
409 our understanding of the intricacies of CRISPR-Cas function.

## 410 **MATERIALS AND METHODS**

411

### 412 **In vivo assay for Acr activity**

413 In vivo assays to detect anti-CRISPR activity were carried out as originally described (Bondy-  
414 Denomy et al., 2013). pHERD30T (Qiu, Damron, Mima, Schweizer, & Yu, 2008) derived  
415 plasmids were used to express AcrIF9 homologues in *P. aeruginosa* strain UCBPP-PA14  
416 (PA14), which possesses an active type I-F CRISPR-Cas system. Lysates of a CRISPR-Cas  
417 sensitive phage (DMS3m) or a CRISPR-Cas insensitive phage (DMS3) were spotted in ten-fold  
418 dilutions onto lawns of PA14 transformed with plasmids expressing Acrs of interest. A strain  
419 carrying pHERD30T was used as a negative control. Plates were incubated at 30 °C overnight.  
420 Homologues to be tested were identified by PSI-BLAST (2 iterations) (Altschul & Koonin,  
421 1998). The protein sequence alignment was constructed and analyzed using Jalview  
422 (Waterhouse, Procter, Martin, Clamp, & Barton, 2009).

### 423 **Expression and purification of Csy complex and Acrs**

424 The *P. aeruginosa* Csy complex including crRNA was expressed from plasmids in *E. coli* strain  
425 BL21(DE3) as previously described (Wiedenheft et al., 2011). Cas7f is tagged with 6xHis. To  
426 produce Csy:F9, the constructs expressing Csy complex and crRNA as stated above were co-  
427 expressed with pCDF-1b expressing untagged AcrIF9.

428 Cultures of *E. coli* BL21 (DE3) expressing the protein of interest were grown to an optical  
429 density (OD<sub>600</sub>) of 0.6 and then induced with 1 mM isopropyl-b-D-thiogalactoside (IPTG) for  
430 16h at 16 °C. Cells were collected by centrifugation at 7000 g for 15 min and resuspended in  
431 binding buffer (20 mM Tris pH 7.5, 200 mM NaCl, 5 mM imidazole, 1 mM tris (2-  
432 carboxyethyl)phosphine (TCEP)). The cells were lysed by sonication and the resulting lysates  
433 were centrifuged at 17,000 g for 25 min to remove cell debris. The supernatant was mixed with  
434 Ni-NTA beads and incubated for 1 hr at 4 °C. The lysates and the beads were then passed  
435 through a column, washed 5 times with wash buffer (20 mM Tris, pH 7.5, 200 mM NaCl, 30  
436 mM imidazole, 5 mM β-mercaptoethanol) and then eluted in buffer containing 300 mM  
437 imidazole. Purified protein was dialysed into 20 mM Tris pH 7.5, 200 mM NaCl, 1 mM TCEP  
438 overnight. Affinity-purified proteins were fractionated by size exclusion chromatography (SEC)  
439 using a GE Life Sciences Superdex 200 16/600 column. Fractions were collected in 1.5 ml  
440 volumes and monitored by optical density at 280 nm. Protein purity was assessed by  
441 visualization on Coomassie blue R250 stained SDS-PAGE gels.

## 442 **Assessing Acr binding to the Csy complex**

443 Purified 6xHis-tagged Csy complex (1000 nM) was bound to Ni-NTA beads and incubated with  
444 excess Acr (5000 nM) for 30 min at 4 °C in binding buffer (20 mM Tris pH 7.5, 200 mM NaCl,  
445 5 mM imidazole, 1 mM TCEP). Competitor Acr was added in equimolar concentration and  
446 incubated for 30 min at 4 °C. Bound Csy complex and Acr was collected through centrifugation  
447 at 4000 rpm for 2 min to remove unbound Acr. The reaction was then washed three times with  
448 wash buffer (20 mM Tris, pH 7.5, 200 mM NaCl, 30 mM imidazole, 5 mM β-mercaptoethanol)  
449 with a centrifugation step after each wash. The sample was then eluted in elution buffer (20 mM  
450 Tris, pH 7.5, 200 mM NaCl, 300 mM imidazole, 5 mM β-mercaptoethanol). The samples were  
451 visualized on Coomassie blue R250 stained SDS–PAGE gels. Each experiment was conducted at  
452 least 3 times and the same result was obtained each time. Single representation is shown in Fig.  
453 S2.

## 454 **Site-directed mutagenesis**

455 Complementary oligonucleotides comprising the codon to be mutated plus 20 nucleotides in both  
456 directions were synthesized by Eurofins Genomics. The entire plasmid template was then PCR  
457 amplified with the primers containing the mutations using Phusion DNA polymerase.  
458 Subsequently, the template was digested with DpnI and the PCR product was transformed into *E.*  
459 *coli* DH5α. Mutations were confirmed by DNA sequencing.

## 460 **DNA binding assays**

461 DNA molecules (sequences shown below) were synthesized (Eurofins Genomics) that contain 32  
462 nucleotides that is either complementary (specific) to the crRNA in the Csy complex or  
463 scrambled (nonspecific). The DNA was fluorescently labeled at the 5' end with either 6-FAM or  
464 Cy5. To generate dsDNA, the labeled strand was mixed with an unlabeled complementary  
465 strand, heated to 100 °C, and allowed to return slowly to room temperature. DNA binding  
466 reactions were conducted in a binding buffer (10 mM HEPES, pH 7.5, 1 mM MgCl<sub>2</sub>, 20 mM  
467 KCl, 1 mM TCEP, and 6% glycerol) at 37 °C for 15 min. A DNA concentration of 100 nM was  
468 used in EMSA reactions with Csy or Csy:Acr complexes at 2000 nM. In competitive DNA  
469 binding experiments, the Csy complex, or Csy:F9 (1000 nM), were first incubated with 300 nM  
470 of DNA at 37 °C for 15 min. Then the competitor DNA was added at increasing concentrations  
471 with the following ratios (1:1, 1:2, 1:4) and incubated at 37 °C for another 15 min. For EMSA  
472 experiments with competing Acrs, the Csy complex was first incubated with ten-fold excess of  
473 one Acr for 1 hour at 4 °C then equimolar amount of the competitor Acr was added and  
474 incubated under the same conditions. 100 nm DNA was then incubated with the resulting Acr-  
475 bound Csy complex at 37 °C for 15 min. All EMSA reactions were resolved on native 4% or 6%  
476 polyacrylamide TBE gels. Gels were visualized with a Typhoon imager at 473 nm (6-FAM) and  
477 635 nm (Cy5). Every EMSA experiment was carried out at least three times with reproducible  
478 results. Single representative gels are shown in figures.

479 For FP assays, Cy5 labeled DNA probes (4 nM) were incubated with purified Csy or Csy:F9  
480 complexes at increasing concentrations (6.25, 12.5, 25, 50, 100, 200, 400, 800 nM) in a total  
481 volume of 50 ul in Greiner Bio-one 96 well black flat-bottom microplates. The samples were  
482 mixed with the assay buffer (20 mM Hepes pH 7.5, 50 mM KCl, 5 mM MgCl<sub>2</sub>, 0.01% Triton  
483 X100, 2 mM DTT, 0.1mg/ml bovine gamma globulin) and incubated at 37 °C for 30 min. The  
484 plate was then analyzed with a Tecan Microplate Reader Spark at 635 nM. The polarization

485 signal was corrected to the reference (Cy5-DNA only) and the blank (assay buffer only). For  
486 competitive assays, the Csy or Csy:F9 complex (100 nM) was first incubated with Cy5-labeled  
487 DNA at 4 nM for 30 min at 37 °C and then competed with increasing concentrations of  
488 unlabeled DNA (0, 0.5, 1, 2, 4, 8, 16, 32 nM) for 30 min at 37 °C. All FP assays were performed  
489 at least 3 times. Average values are plotted with error bars representing standard deviation.

490 The sequences of the DNA used for DNA binding assays are shown below. Protospacer  
491 sequences complementary to the crRNA are in bold and underlined. PAMs are in red. In the 2x  
492 and 1x sequences we used a 24 nt protospacer instead of 32 nt in order to keep all dsDNA target  
493 sequences used at approximately the same length. We found that the Csy complex binds with  
494 similar affinity to a 24 nt protospacer.

495 50 bp DNA<sub>SP</sub> target strand:

496 5':GAATGACCTA**CAGGTAGACGCGGACATCAAGCCCGCCGTGAA****GG**CATGTCAA

497 50 bp DNA<sub>NS</sub>:

498 5':GCGCACCTATTAACCGTTCGCAGAAACCAGTAGTAGTCCAAGCGACATGCAG

499 DNA<sub>2x</sub> target strand:

500 5':**CGCGGACATCAAGCCCGCCGTGAA****GG**CATGT**CGCGGACATCAAGCCCGCCG**  
501 **TGAA****GG**CATGT

502 DNA<sub>1x</sub> target strand:

503 5':GTAGTAGTCCAACGGCATGTAATGACCTA**CGCGGACATCAAGCCCGCCGTGAA**  
504 **GG**CATGT

505

506 *In vivo* activity measurement for Csy<sub>Sba</sub> The efficiency of transformation assay (EOT) was  
507 performed as described previously (Pausch et al., 2017). Csy<sub>Sba</sub> was expressed in *E. coli* BL21-  
508 AI in the presence and absence of AcrIF9<sub>Vpa</sub>. A spacer targeting the ampicillin resistance cassette  
509 of pETDuet-1 was used to determine the EOT. EOT equals to the colony ratio between the  
510 colony count of the strain of interest and its corresponding Cas3 HD mutant strain, presented as  
511 percentages. Error bars represent the standard error of the mean, three replicates were quantified.

## 512 **Bio-layer interferometry (BLI)**

513 The conditions used in the BLI experiments were as described previously (Müller-Esparza,  
514 Osorio-Valeriano, Steube, Thanbichler, & Randau, 2020). AcrIF9<sub>Vpa</sub> and Csy complex were  
515 mixed at a molar ratio of 1:1 and incubated for 10 min at room temperature in BLI buffer (0.1  
516 μM BSA and 0.01% Triton X-100). The Csy complex, Csy:F9, or AcrIF9<sub>Vpa</sub> alone, was tested  
517 against 100 nM of either dsDNA<sub>SP</sub> or dsDNA<sub>NS</sub>. Assays were performed in duplicate on the  
518 BLItz platform (FortéBio) using High Precision Streptavidin (SAX) Biosensors (FortéBio).

## 519 **Limited proteolysis experiment**

520 Purified Csy or Csy:Acr complexes were diluted to a final concentration of 1000 nM in buffer  
521 (20 mM Tris, pH 7.5, 200 mM NaCl, 1 mM TCEP). Samples were incubated at 55 °C with 0.003  
522 mg/ml Thermolysin (Sigma Aldrich). Aliquots were removed at each timepoint into 2x protein  
523 sample buffer (62.5 mM Tris pH 6.8, 2.5% SDS, 0.002% Bromophenol Blue, 5% β-  
524 mercaptoethanol, 10% glycerol) heated at 100 °C for 5 min to inactivate Thermolysin. Samples  
525 were analyzed on Coomassie Blue stained SDS-PAGE gels. Band intensities on the gels were  
526 quantitated using ImageJ (Schneider, Rasband, & Eliceiri, 2012). The intensity of Cas7f at each

527 timepoint was normalized to that of Cas6f. The relative band intensity was then determined by  
528 taking the ratio between Cas7f at the different time points to that at 0 min.

529

### 530 **Acknowledgements**

531 This work was supported by Canadian Institutes of Health Research grant FDN-15427 (A.R.D.).  
532 L.R. was funded by the German Research Foundation (DFG, grant SPP 2141).

533

### 534 **Competing Interests**

535 A.R.D is a scientific advisory board member for Acrigen Biosciences and is an inventor on  
536 patents relating to anti-CRISPR proteins. The other authors declare no competing interests.

537

538

539

540

541

## 542 REFERENCES

543

544

- 545 Altschul, S. F., & Koonin, E. V. (1998). Iterated profile searches with PSI-BLAST--a tool for  
546 discovery in protein databases. *Trends Biochem Sci* **23**, 444-447. doi:10.1016/s0968-  
547 0004(98)01298-5
- 548 Anderson, B. J., Larkin, C., Guja, K., & Schildbach, J. F. (2008). Using fluorophore-labeled  
549 oligonucleotides to measure affinities of protein-DNA interactions. *Methods Enzymol*  
550 **450**, 253-272. doi:10.1016/S0076-6879(08)03412-5
- 551 Athukoralage, J. S., McMahon, S. A., Zhang, C., Gruschow, S., Graham, S., Krupovic, M., . . .  
552 White, M. F. (2020). An anti-CRISPR viral ring nuclease subverts type III CRISPR  
553 immunity. *Nature* **577**, 572-575. doi:10.1038/s41586-019-1909-5
- 554 Bondy-Denomy, J., & Davidson, A. R. (2014). To acquire or resist: the complex biological  
555 effects of CRISPR-Cas systems. *Trends Microbiol* **22**, 218-225.  
556 doi:10.1016/j.tim.2014.01.007
- 557 Bondy-Denomy, J., Davidson, A. R., Doudna, J. A., Fineran, P. C., Maxwell, K. L., Moineau, S.,  
558 . . . Wiedenheft, B. (2018). A Unified Resource for Tracking Anti-CRISPR Names.  
559 *CRISPR J* **1**, 304-305. doi:10.1089/crispr.2018.0043
- 560 Bondy-Denomy, J., Garcia, B., Strum, S., Du, M., Rollins, M. F., Hidalgo-Reyes, Y., . . .  
561 Davidson, A. R. (2015). Multiple mechanisms for CRISPR-Cas inhibition by anti-  
562 CRISPR proteins. *Nature* **526**, 136-139. doi:10.1038/nature15254
- 563 Bondy-Denomy, J., Pawluk, A., Maxwell, K. L., & Davidson, A. R. (2013). Bacteriophage genes  
564 that inactivate the CRISPR/Cas bacterial immune system. *Nature* **493**, 429-432.  
565 doi:10.1038/nature11723
- 566 Chowdhury, S., Carter, J., Rollins, M. F., Golden, S. M., Jackson, R. N., Hoffmann, C., . . .  
567 Wiedenheft, B. (2017). Structure Reveals Mechanisms of Viral Suppressors that Intercept  
568 a CRISPR RNA-Guided Surveillance Complex. *Cell* **169**, 47-57 e11.  
569 doi:10.1016/j.cell.2017.03.012
- 570 Davidson, A. R., Lu, W. T., Stanley, S. Y., Wang, J., Mejdani, M., Trost, C. N., . . . Sontheimer,  
571 E. J. (2020). Anti-CRISPRs: Protein Inhibitors of CRISPR-Cas Systems. *Annu Rev*  
572 *Biochem.* doi:10.1146/annurev-biochem-011420-111224
- 573 Dong, L., Guan, X., Li, N., Zhang, F., Zhu, Y., Ren, K., . . . Huang, Z. (2019). An anti-CRISPR  
574 protein disables type V Cas12a by acetylation. *Nat Struct Mol Biol* **26**, 308-314.  
575 doi:10.1038/s41594-019-0206-1
- 576 Forsberg, K. J., Bhatt, I. V., Schmidtke, D. T., Javanmardi, K., Dillard, K. E., Stoddard, B. L., . . .  
577 Malik, H. S. (2019). Functional metagenomics-guided discovery of potent Cas9  
578 inhibitors in the human microbiome. *Elife* **8**. doi:10.7554/eLife.46540
- 579 Guo, T. W., Bartesaghi, A., Yang, H., Falconieri, V., Rao, P., Merk, A., . . . Subramaniam, S.  
580 (2017). Cryo-EM Structures Reveal Mechanism and Inhibition of DNA Targeting by a  
581 CRISPR-Cas Surveillance Complex. *Cell* **171**, 414-426 e412.  
582 doi:10.1016/j.cell.2017.09.006
- 583 Harrington, L. B., Doxzen, K. W., Ma, E., Liu, J. J., Knott, G. J., Edraki, A., . . . Doudna, J. A.  
584 (2017). A Broad-Spectrum Inhibitor of CRISPR-Cas9. *Cell* **170**, 1224-1233 e1215.  
585 doi:10.1016/j.cell.2017.07.037

- 586 Hirschi, M., Lu, W.-T., Santiago-Frangos, A., Wilkinson, R., Golden, S. M., Davidson, A. R., . . .  
587 . Wiedenheft, B. (2020). AcrIF9 tethers non-sequence specific dsDNA to the CRISPR  
588 RNA-guided surveillance Complex. *Nat Commun*, in press.
- 589 Makarova, K. S., Wolf, Y. I., Iranzo, J., Shmakov, S. A., Alkhnbashi, O. S., Brouns, S. J. J., . . .  
590 Koonin, E. V. (2020). Evolutionary classification of CRISPR-Cas systems: a burst of  
591 class 2 and derived variants. *Nat Rev Microbiol* **18**, 67-83. doi:10.1038/s41579-019-  
592 0299-x
- 593 Makarova, K. S., Wolf, Y. I., & Koonin, E. V. (2018). Classification and Nomenclature of  
594 CRISPR-Cas Systems: Where from Here? *CRISPR J* **1**, 325-336.  
595 doi:10.1089/crispr.2018.0033
- 596 Marino, N. D., Pinilla-Redondo, R., Csorgo, B., & Bondy-Denomy, J. (2020). Anti-CRISPR  
597 protein applications: natural brakes for CRISPR-Cas technologies. *Nat Methods*.  
598 doi:10.1038/s41592-020-0771-6
- 599 Müller-Esparza, H., Osorio-Valeriano, M., Steube, N., Thanbichler, M., & Randau, L. (2020).  
600 Bio-layer Interferometry Analysis of the Target Binding Activity of CRISPR-Cas  
601 Effector Complexes. *Frontiers in Microbiology* **in press**.
- 602 Nakamura, M., Srinivasan, P., Chavez, M., Carter, M. A., Dominguez, A. A., La Russa, M., . . .  
603 Qi, L. S. (2019). Anti-CRISPR-mediated control of gene editing and synthetic circuits in  
604 eukaryotic cells. *Nat Commun* **10**, 194. doi:10.1038/s41467-018-08158-x
- 605 Pausch, P., Muller-Esparza, H., Gleditsch, D., Altegoer, F., Randau, L., & Bange, G. (2017).  
606 Structural Variation of Type I-F CRISPR RNA Guided DNA Surveillance. *Mol Cell* **67**,  
607 622-632 e624. doi:10.1016/j.molcel.2017.06.036
- 608 Pawluk, A., Staals, R. H., Taylor, C., Watson, B. N., Saha, S., Fineran, P. C., . . . Davidson, A.  
609 R. (2016). Inactivation of CRISPR-Cas systems by anti-CRISPR proteins in diverse  
610 bacterial species. *Nat Microbiol* **1**, 16085. doi:10.1038/nmicrobiol.2016.85
- 611 Qiu, D., Damron, F. H., Mima, T., Schweizer, H. P., & Yu, H. D. (2008). PBAD-based shuttle  
612 vectors for functional analysis of toxic and highly regulated genes in *Pseudomonas* and  
613 *Burkholderia* spp. and other bacteria. *Appl Environ Microbiol* **74**, 7422-7426.  
614 doi:10.1128/AEM.01369-08
- 615 Rollins, M. F., Chowdhury, S., Carter, J., Golden, S. M., Miettinen, H. M., Santiago-Frangos, A.,  
616 . . . Wiedenheft, B. (2019). Structure Reveals a Mechanism of CRISPR-RNA-Guided  
617 Nuclease Recruitment and Anti-CRISPR Viral Mimicry. *Mol Cell* **74**, 132-142 e135.  
618 doi:10.1016/j.molcel.2019.02.001
- 619 Schneider, C. A., Rasband, W. S., & Eliceiri, K. W. (2012). NIH Image to ImageJ: 25 years of  
620 image analysis. *Nat Methods* **9**, 671-675. doi:10.1038/nmeth.2089
- 621 van Duijn, E., Barbu, I. M., Barendregt, A., Jore, M. M., Wiedenheft, B., Lundgren, M., . . .  
622 Heck, A. J. (2012). Native tandem and ion mobility mass spectrometry highlight  
623 structural and modular similarities in clustered-regularly-interspaced shot-palindromic-  
624 repeats (CRISPR)-associated protein complexes from *Escherichia coli* and *Pseudomonas*  
625 *aeruginosa*. *Mol Cell Proteomics* **11**, 1430-1441. doi:10.1074/mcp.M112.020263
- 626 Wang, X., Yao, D., Xu, J. G., Li, A. R., Xu, J., Fu, P., . . . Zhu, Y. (2016). Structural basis of  
627 Cas3 inhibition by the bacteriophage protein AcrF3. *Nat Struct Mol Biol* **23**, 868-870.  
628 doi:10.1038/nsmb.3269
- 629 Waterhouse, A. M., Procter, J. B., Martin, D. M., Clamp, M., & Barton, G. J. (2009). Jalview  
630 Version 2--a multiple sequence alignment editor and analysis workbench. *Bioinformatics*  
631 **25**, 1189-1191. doi:10.1093/bioinformatics/btp033



- 632 Wiedenheft, B., van Duijn, E., Bultema, J. B., Waghmare, S. P., Zhou, K., Barendregt, A., . . .  
633 Doudna, J. A. (2011). RNA-guided complex from a bacterial immune system enhances  
634 target recognition through seed sequence interactions. *Proc Natl Acad Sci U S A* **108**,  
635 10092-10097. doi:10.1073/pnas.1102716108
- 636 Zhang, F., Song, G., & Tian, Y. (2019). Anti-CRISPRs: The natural inhibitors for CRISPR-Cas  
637 systems. *Animal Model Exp Med* **2**, 69-75. doi:10.1002/ame2.12069
- 638 Zhang, K., Wang, S., Li, S., Zhu, Y., Pintilie, G. D., Mou, T. C., . . . Chiu, W. (2020). Inhibition  
639 mechanisms of AcrF9, AcrF8, and AcrF6 against type I-F CRISPR-Cas complex  
640 revealed by cryo-EM. *Proc Natl Acad Sci U S A*. doi:10.1073/pnas.1922638117

641

642

643

644

645

646

647

648

649

650

651

652

653

654

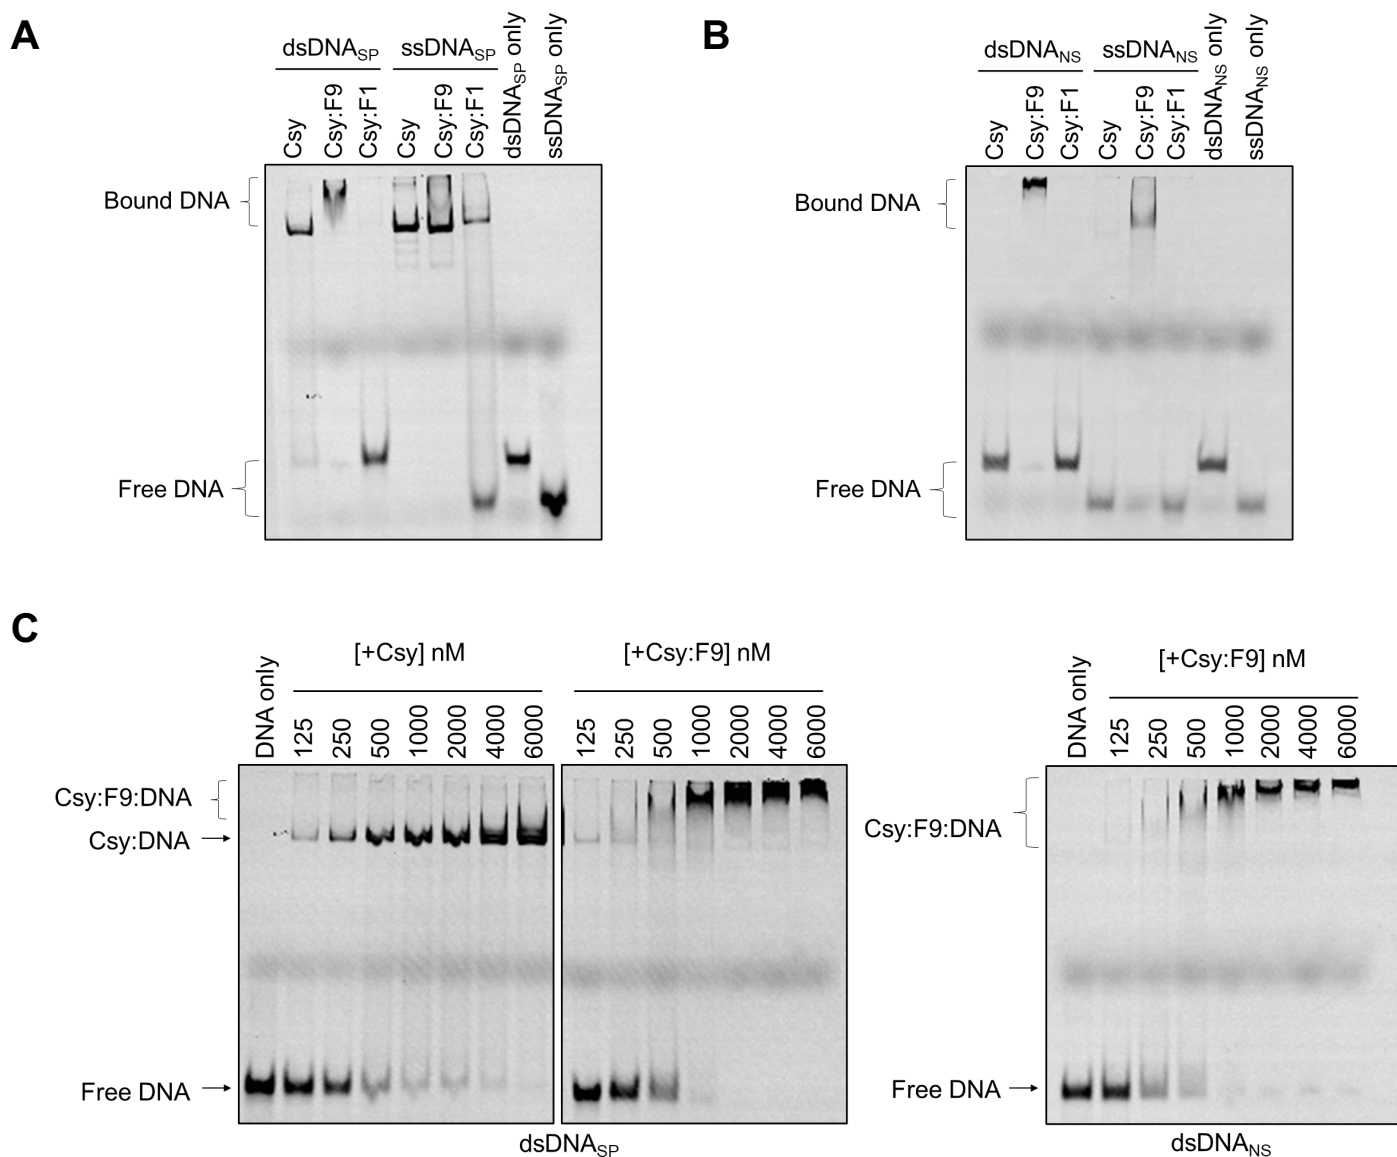

**Fig. 1.** The Csy:F9 complex binds to DNA non-specifically. (A) The binding of Csy, Csy:F9, and Csy:F1 complexes to dsDNA<sub>SP</sub> and ssDNA<sub>SP</sub> was assessed on EMSA gels. (B) The same experiment shown in (A) was performed with dsDNA<sub>NS</sub> and ssDNA<sub>NS</sub>. (C) Increasing concentrations of Csy or Csy:F9 complex were added to constant concentrations of dsDNA<sub>SP</sub> (left two panels) or dsDNA<sub>NS</sub> (right panel). These experiments were performed using 50 bp DNA fragments 5'-labeled with Cyanine 5 (Cy5).

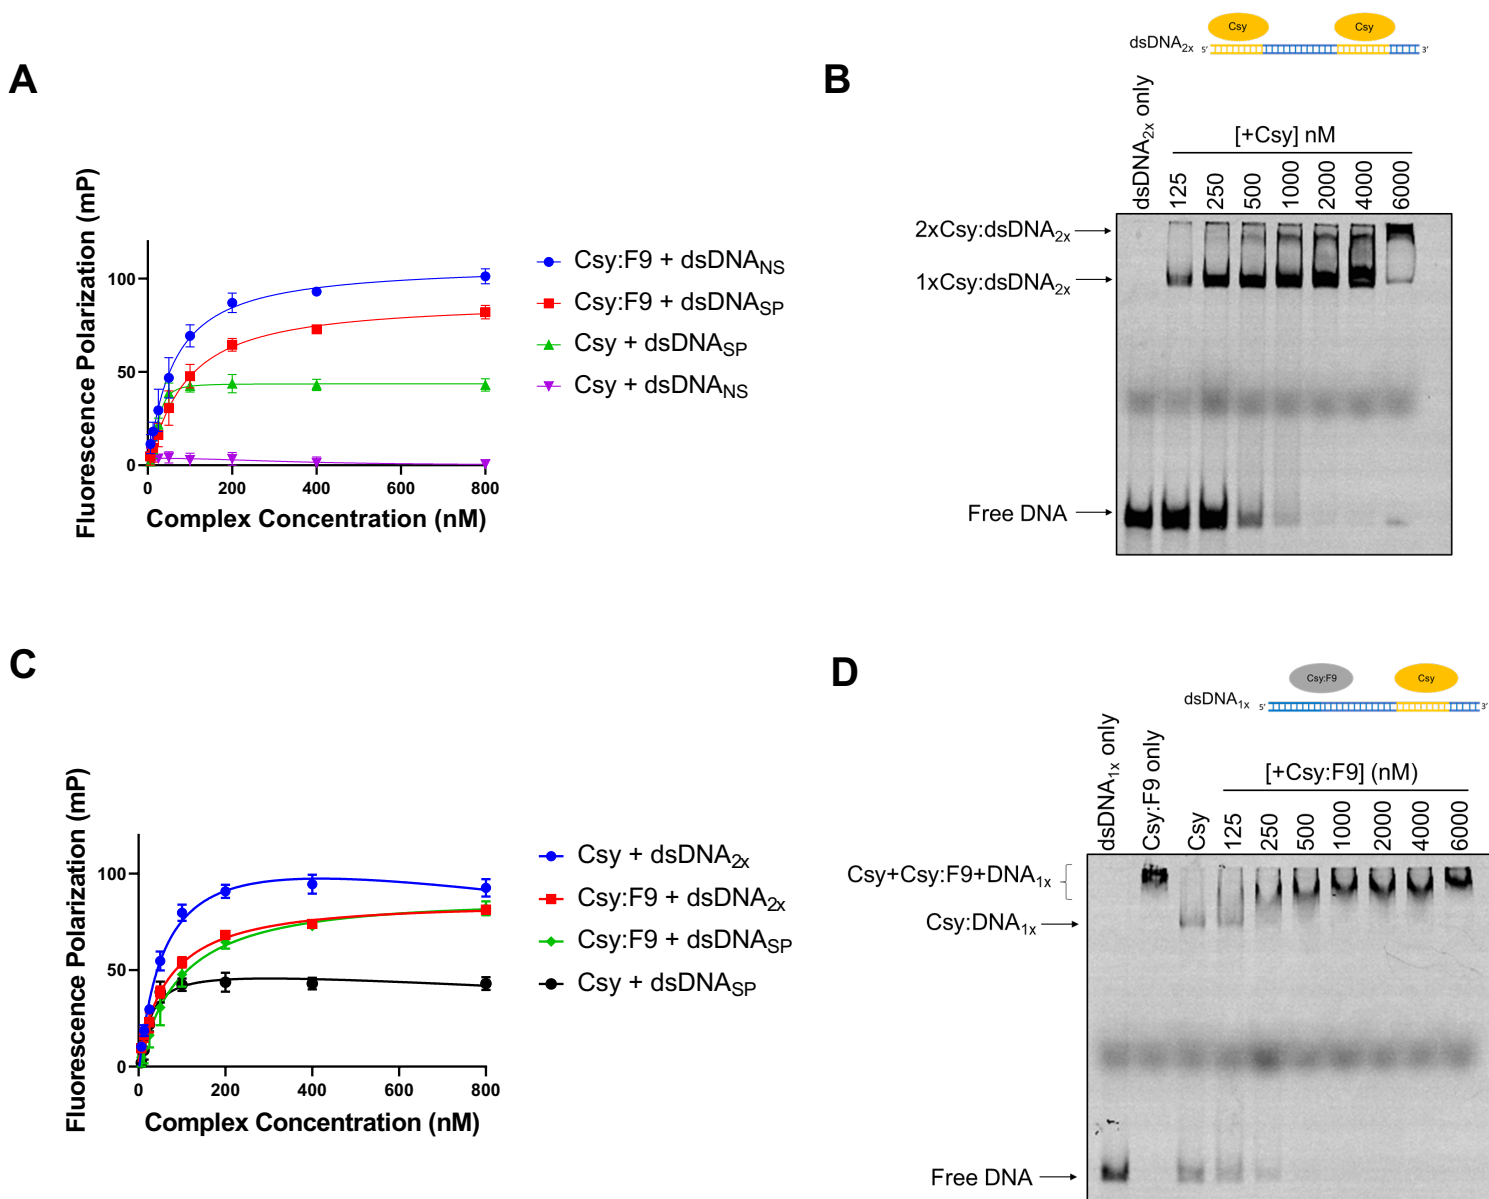

**Fig. 2.** Multiple Csy:F9 can bind to a single piece of dsDNA in a sequence-independent manner. (A) The binding of 50 bp Cy5-labeled dsDNA<sub>SP</sub> and dsDNA<sub>NS</sub> to Csy and Csy:F9 complexes was assessed by monitoring increase in fluorescence polarization (FP). Increasing concentration of complex were added to a constant concentration of dsDNA ligand. In the legend, the arrow points to the type of DNA being bound by the indicated complex. (B) Binding of increasing concentrations of Csy complex to a constant concentration of Cy5-labeled dsDNA<sub>2x</sub> was monitored on EMSA gels. (C) Binding of Cy5-labeled dsDNA<sub>2x</sub> to increasing concentrations of Csy and Csy:F9 complexes was monitored by FP. FP of Csy and Csy:F9 bound to the 50 bp dsDNA<sub>SP</sub> from (A) are included for comparison. (D) Cy5 labeled dsDNA<sub>1x</sub> was pre-saturated with Csy complex, and then increasing concentrations of Csy:F9 complex were added. DNA-binding was monitored by EMSA. The error bars in (A) and (C) correspond to standard deviation (SD),  $n = 3$ .

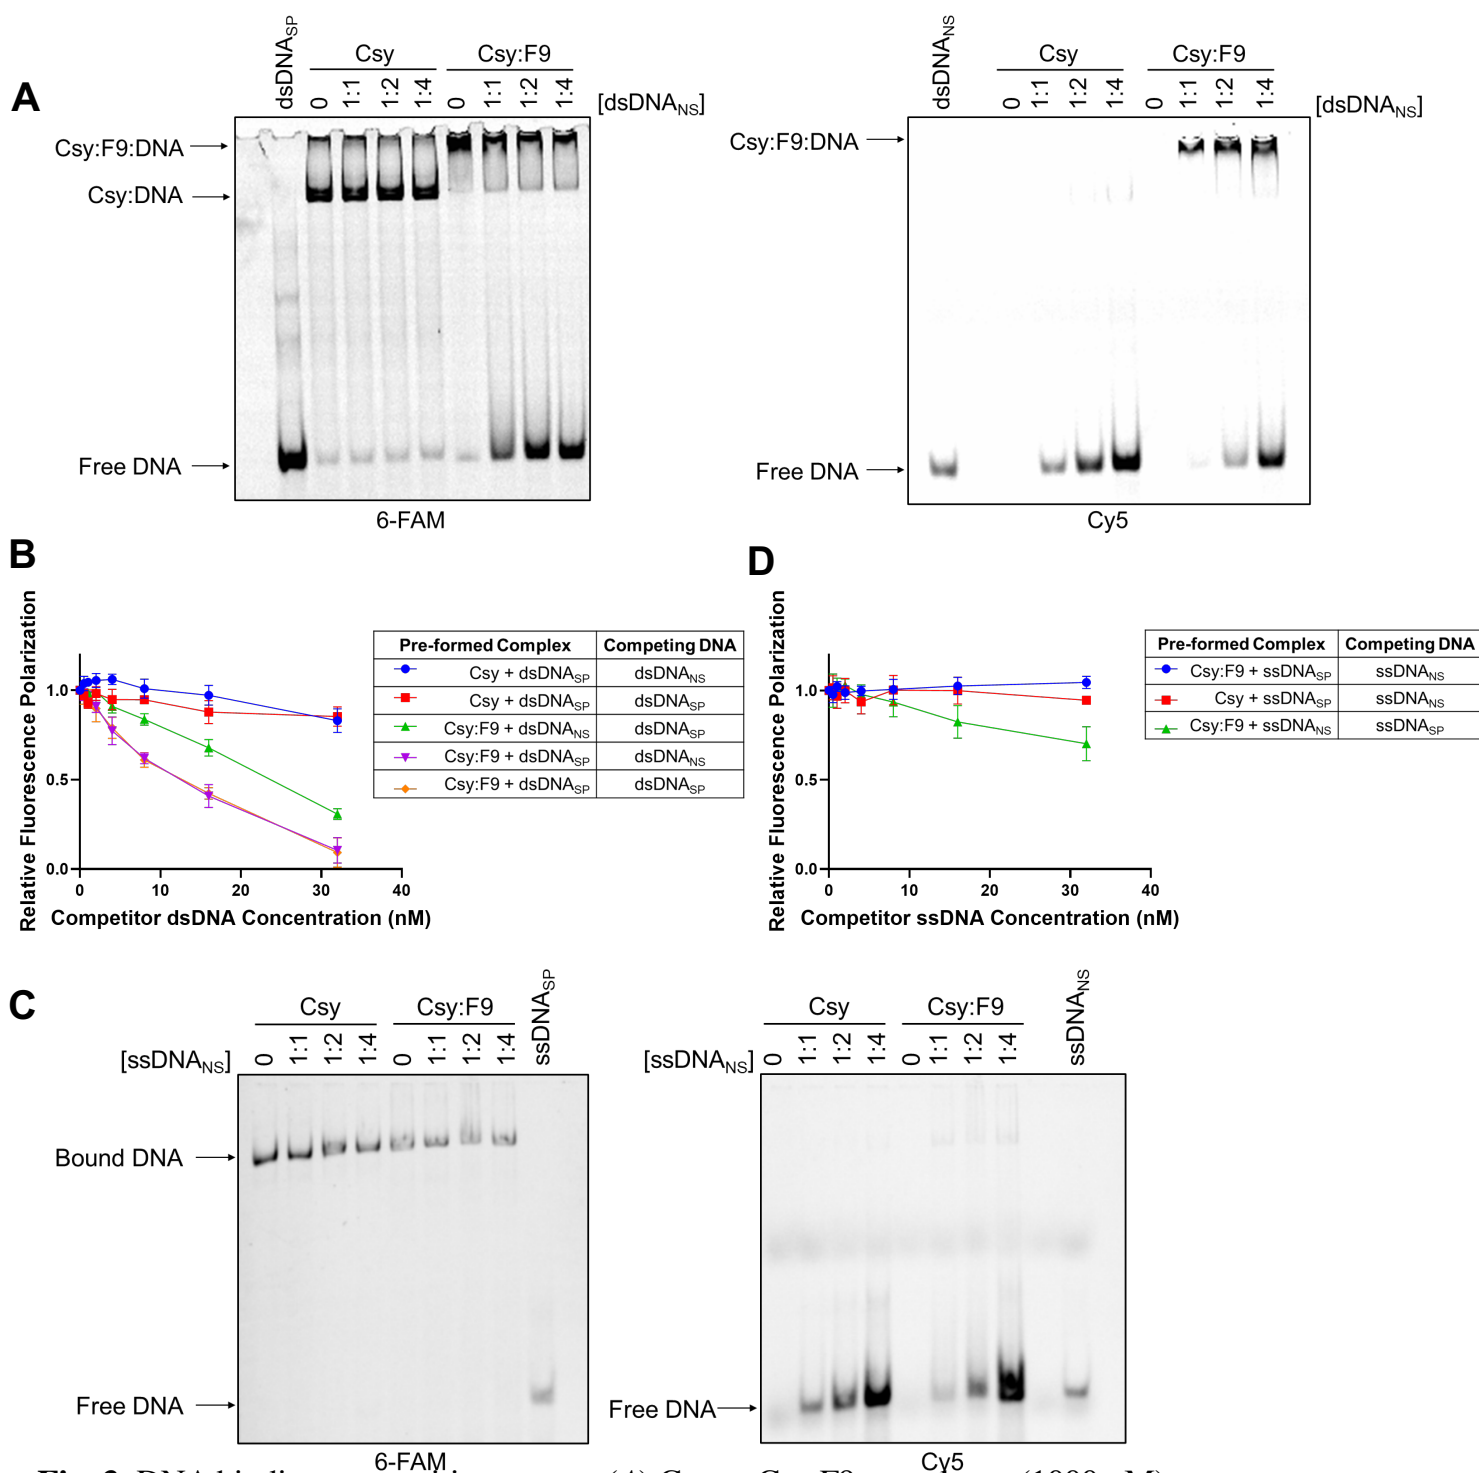

**Fig. 3.** DNA binding competition assays. (A) Csy or Csy:F9 complexes (1000 nM) were pre-saturated with 300 nM 6-FAM labeled dsDNA<sub>SP</sub>, then increasing concentrations of Cy5-labeled dsDNA<sub>NS</sub> were added as competitor. DNA-binding was monitored by EMSA. The ratio of dsDNA<sub>SP</sub> to dsDNA<sub>NS</sub> is shown over each lane. The same gel was irradiated at 473 nm to visualize the 6-FAM-labeled DNA (left panel) and at 673 nm to visualize the Cy5-labeled DNA (right panel). (B) Csy or Csy:F9 complexes were pre-mixed with Cy5-dsDNA at 4 nM then competed with increasing concentrations of unlabeled dsDNA as indicated on the x-axis. Relative fluorescence polarization (y-axis) is the FP value at each competitor concentration divided by the value observed in the absence of competitor DNA. (C) These competition EMSA experiments are similar to (A) except that complexes were pre-saturated with 6-FAM-labeled ssDNA<sub>SP</sub> and the competitor was Cy5-labeled ssDNA<sub>NS</sub>. (D) Competition experiments are similar to (B) except that experiments were performed with specific or non-specific ssDNA. The error bars in (B) and (D) correspond to SD,  $n = 3$ .

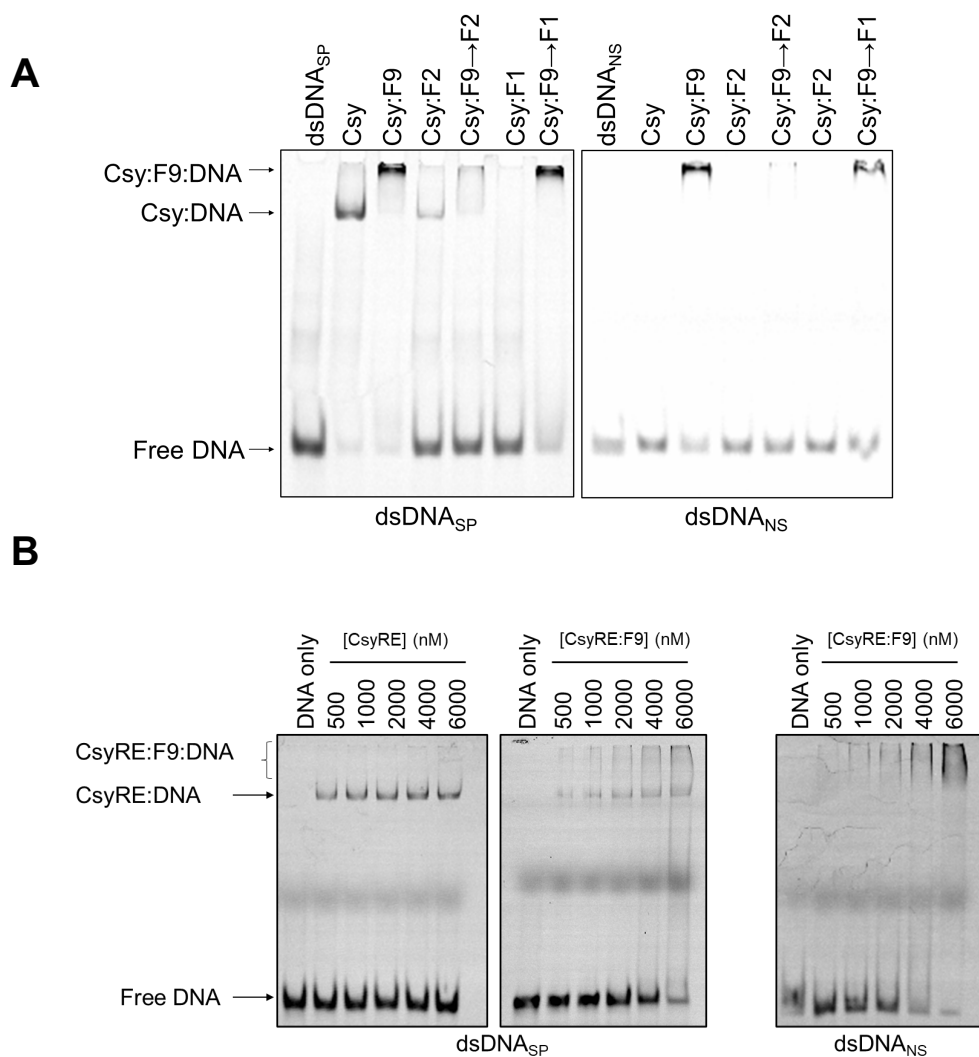

**Fig. 4.** The Cas8f subunit is involved in the Csy:F9 non-specific DNA interaction. (A) The Csy complex was incubated with AcrIF9, AcrIF2, AcrIF1, or combinations thereof prior to incubation with 50 bp fragments of FAM-6- labeled dsDNA<sub>SP</sub> (left) or Cy5-labeled dsDNA<sub>NS</sub> (right). In cases, where two Acrs were added to one reaction, the Acr added second is indicated by (→). DNA binding activity was assayed by EMSA. (B) EMSA gels were used to assess the DNA binding activity of the CsyRE mutant complex in presence (right two panel) or absence (left panel) of AcrIF9. Constant concentrations of dsDNA<sub>SP</sub> (left 2 panels) or dsDNA<sub>NS</sub> (right panel) were mixed with increasing concentrations of CysRE or CysRE:F9 complex.

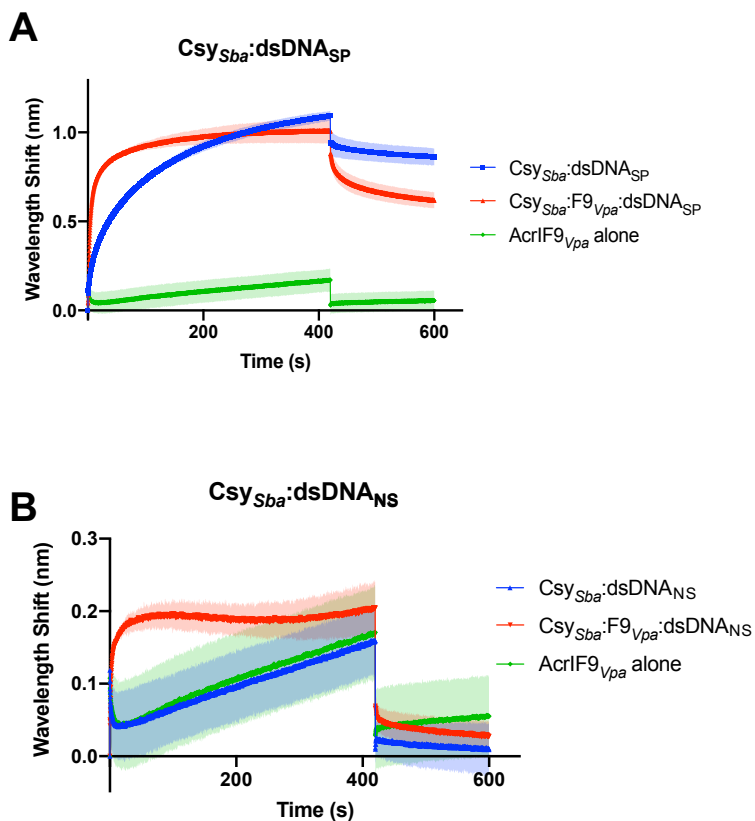

**Fig. 5.** Binding of Type I-F Csy complex from *S. baltica* ( $Csy_{Sba}$ ) to dsDNA measured by Bio-Layer Interferometry (BLI) (A) The wavelength shift (nm) generated by the binding of  $Csy_{Sba}$  complex to immobilized  $dsDNA_{SP}$  fragments was measured.  $AcrIF9_{Vpa}$  was mixed with the Csy complex at a 1:1 molar ratio for 10 min at room temperature prior to the initiation of the BLI assay. The shift elicited by  $AcrIF9_{Vpa}$  binding to  $dsDNA_{SP}$  is shown as a control ( $AcrIF9_{Vpa}$  alone). Assays were performed in duplicates, the lighter outline represents the standard error from the mean. (B) The same experiments as described in (A) were performed using  $dsDNA_{NS}$ .

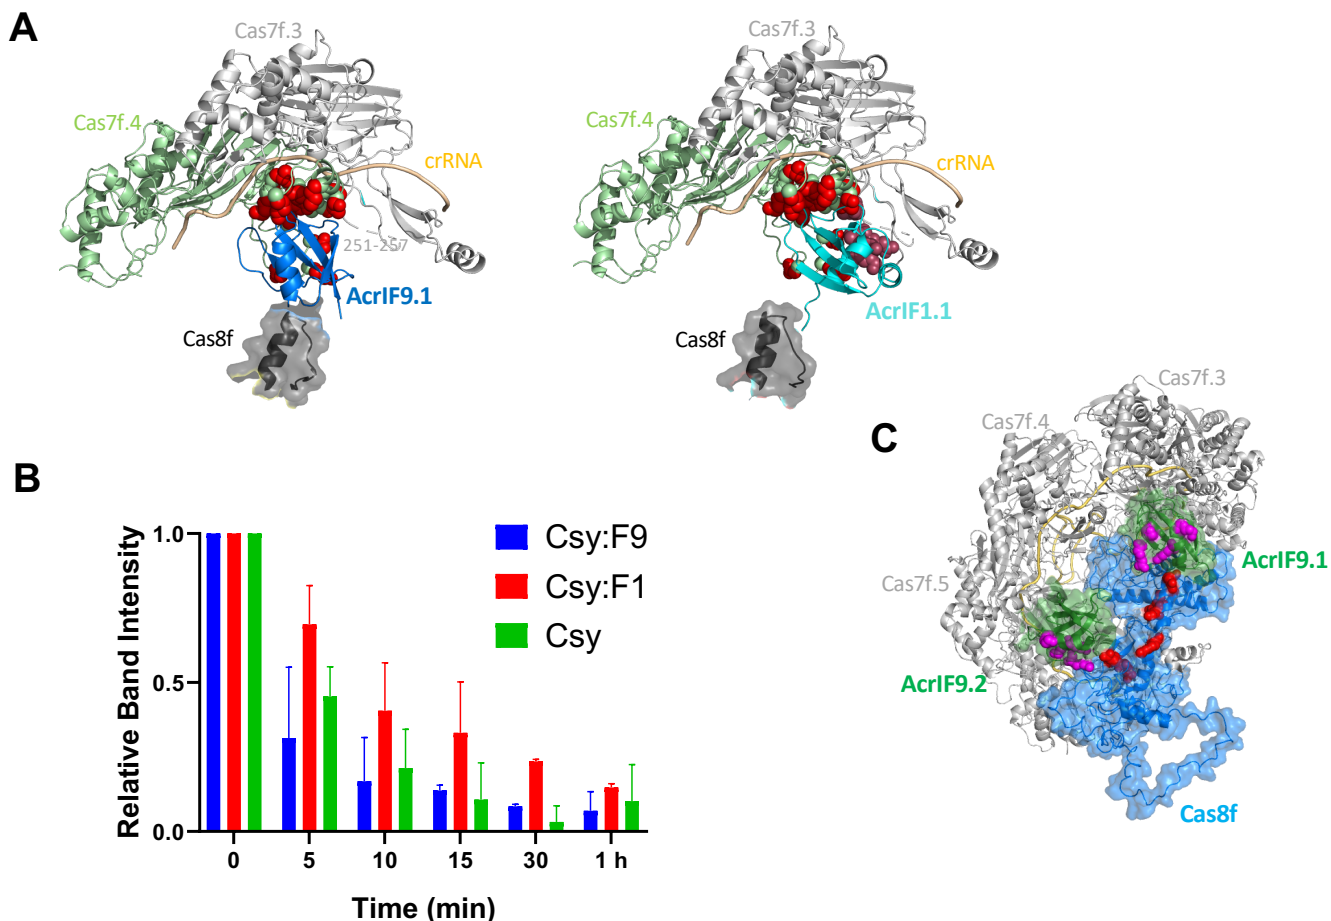

**Fig. 6.** Features of the interactions of AcrIF9 and AcrIF1 with the Csy Complex. (A) The interaction interfaces of AcrIF9.1 (left) and AcrIF1.1 (right) with the Csy complexes are shown. Residue side chains in Cas7f.4 that interact with both AcrIF9.1 and AcrIF1.1 are shown in red. When bound to AcrIF9.1, a loop in Cas7f.4 (residues 251-257) indicated in the left panel is disordered. When AcrIF1.1 is bound this loop is ordered and forms intersubunit bridging interactions. Cas7f.4 residues in this interface from the AcrIF1 bound Csy complex (PDB ID 5UZ9) are shown in dark red in the right panel. These figures were made by overlaying the Cas7f subunits of the AcrIF1 bound and AcrIF9 bound (PDB ID 6VQV) structures. These subunits overlay with less than 2 Å root mean square deviation. (B) Csy, Csy:F9, and Csy:F1 complexes were treated with the protease, thermolysin, at 55 °C for various times. Coomassie Blue stained SDS polyacrylamide electrophoresis gels were analyzed to monitor the degradation of Csy subunits over time (Fig. S7). The intensity of the band corresponding to Cas7f at each time point is shown. The Cas7f levels at each timepoint were normalized to that of Cas6f, which was not detectably degraded during this experiment. Cas7f levels were also normalized to the amount of Cas7 present at the 0 time point. Error bars represent SD. Three replicates were analyzed. (C) A positive charged surface comprised of AcrIF9 and Cas8 residues is shown. Conserved positively charged residues in AcrIF9 are shown in magenta (Fig. S1). Positively charged residues in Cas8f (R207, K216, R219, R224, R258, R259; underlined residues were substituted with Glu in the CsyRE complex) are shown in red.

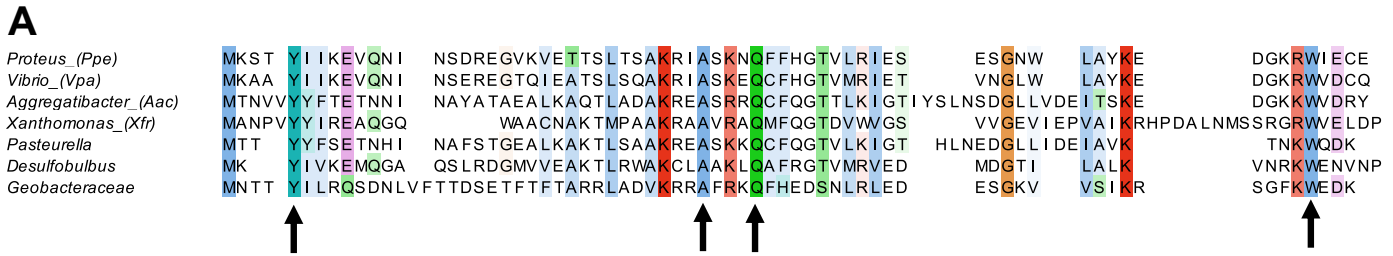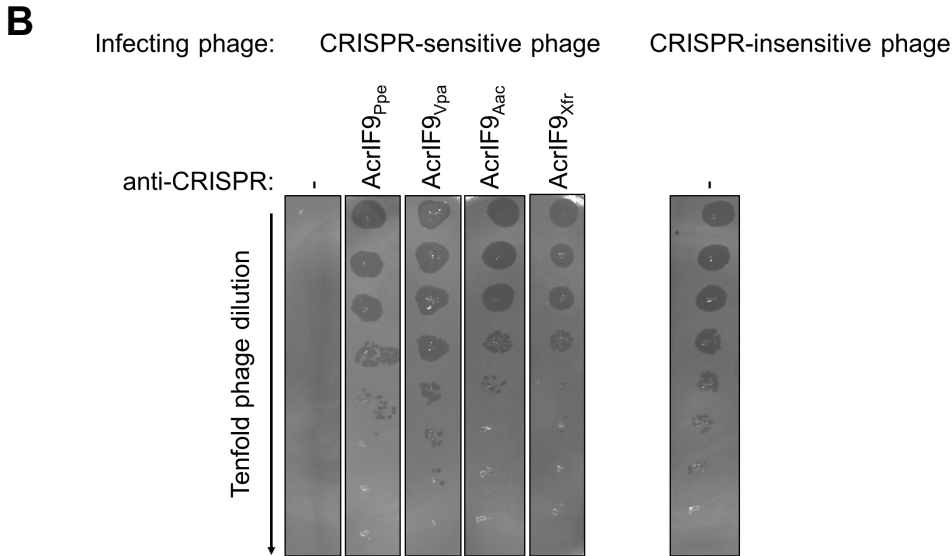

**Fig S1.** AcrIF9 homologues inhibits the *P. aeruginosa* type I-F CRISPR-Cas system. (A) A sequence alignment of 7 diverse members (average pairwise sequence identity = 34%) of the AcrIF9 family. The alignment is colored by conservation according to the ClustalX scheme. The conserved positively charged positions are red and light red. Other completely conserved non-Gly positions are indicated with arrows. The sequences shown are PROPEN\_01997 (*Proteus penneri* ATCC 35198), D5E77\_24790 (*Vibrio parahaemolyticus*), FXB80\_00875 (*Aggregatibacter actinomycetemcomitans*), PD5205\_04008 (plasmid) (*Xanthomonas fragariae*), BGK37\_12565 (*Pasteurella multocida*), JT06\_19085 (*Desulfobulbus* sp. Tol-SR), and A2076\_14270 (*Geobacteraceae* GWC2\_53\_11). (B) Dilutions of CRISPR-sensitive (DMS3m) and CRISPR-insensitive bacterium (DMS3) phage lysates were spotted onto lawns of *P. aeruginosa* strain PA14, which has an active type I-F CRISPR-Cas system. PA14 was transformed with plasmids expressing the indicated AcrIF9 homologs. Zones of clearing indicate successful phage infection and inhibition of the CRISPR-Cas system. The negative control is strain PA14 carrying only the expression vector.



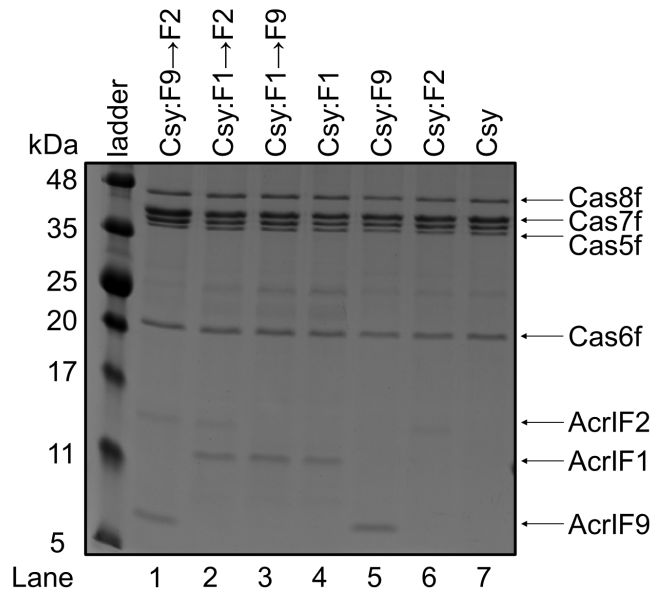

**Fig. S2.** Competition between Acrs for binding to the Csy complex. Untagged Acrs were mixed with the Csy complex containing 6xHis-tagged Cas7f. The samples were then affinity purified using Ni-NTA beads to remove unbound Acr and proteins eluted from the beads were visualized on Coomassie Blue stained SDS-PAGE gels. In competitive binding experiments the Acr following the (→) was added second after preincubation with the first Acr.

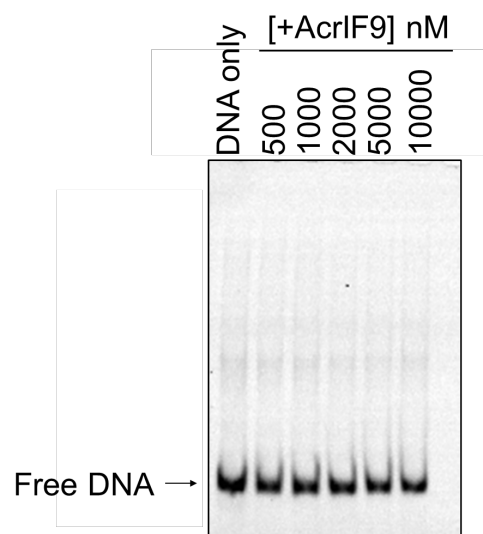

**Fig. S3.** AcrIF9 does not bind dsDNA without the Csy complex. Increasing concentrations of AcrIF9 were mixed with 100 nM of FAM-6 labeled 50 bp dsDNA<sub>SP</sub> fragment. No Csy complex was present. DNA binding was detected by EMSA.

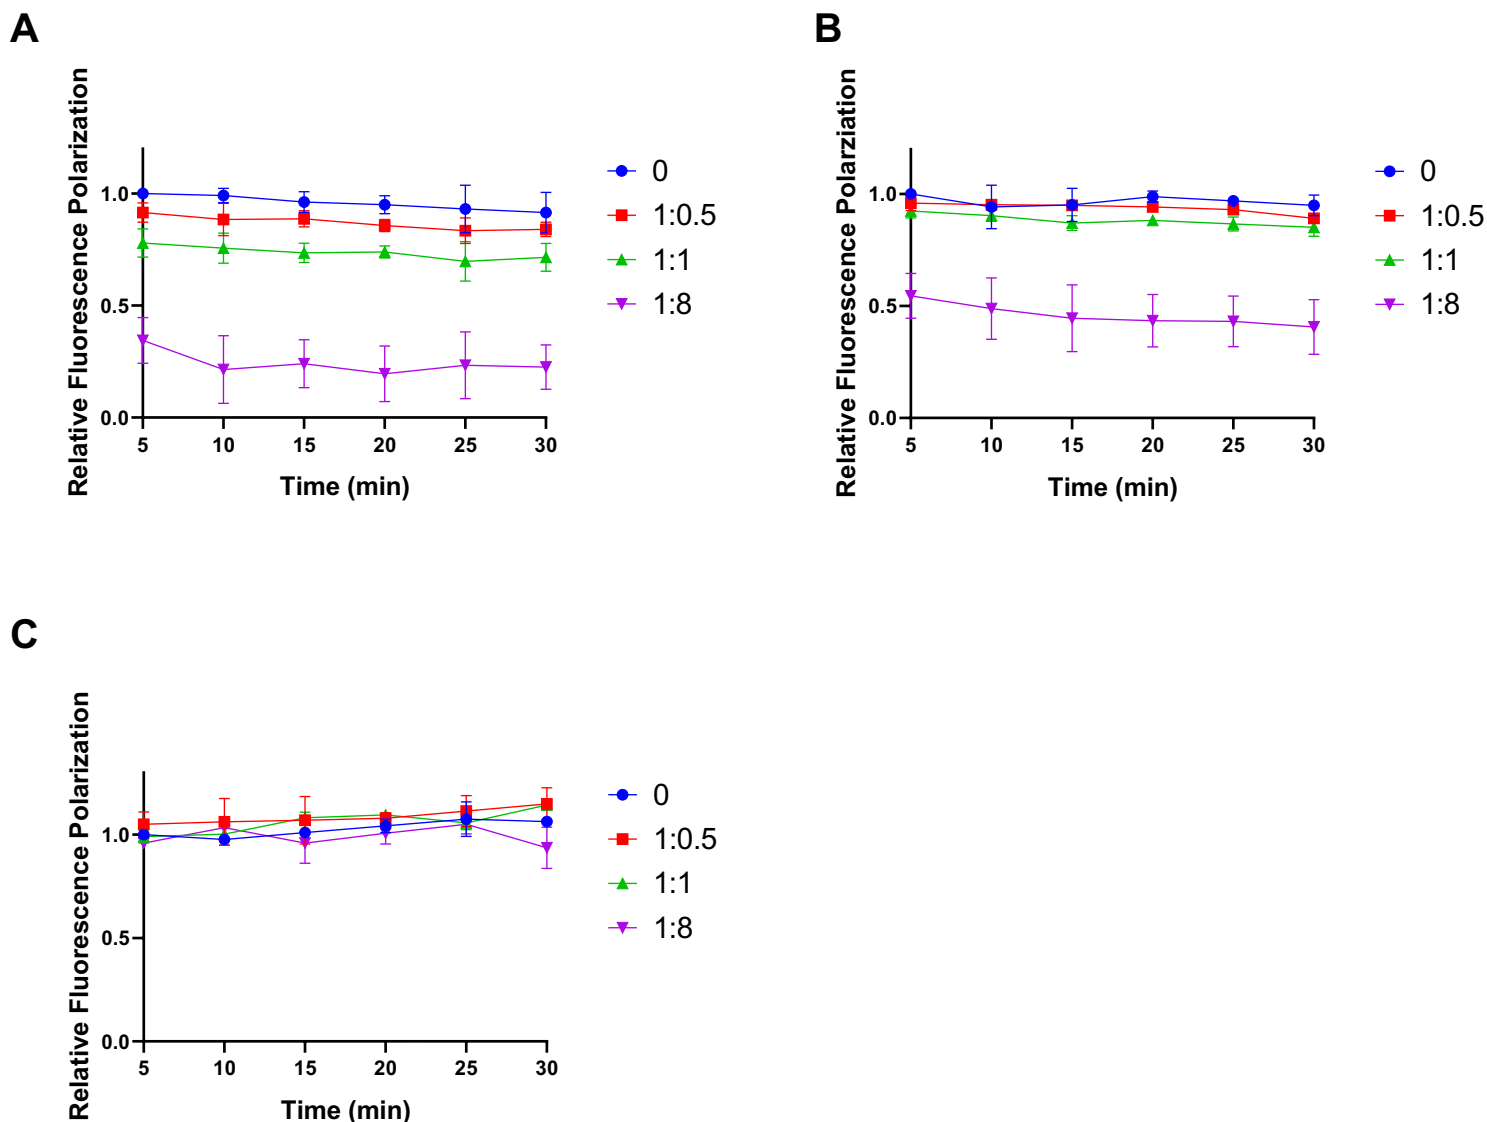

**Fig. S4.** The dsDNA bound by Csy:F9 is rapidly competed off. Csy or Csy:F9 complexes were pre-saturated with Cy5-labeled DNA, then increasing concentrations of unlabeled DNA were added at levels ranging from 0.5 to 8-fold excess over the concentration of the labeled DNA (i.e. ratios of 1:0.5, 1:1, 1:8). FP measurements were taken at various times after addition of the unlabeled DNA. Due to limitations of the apparatus being used, time points shorter than 5 min could not be assayed. Relative fluorescence polarization was calculated using the ratio of the values from each competitor concentration to that without competitor DNA at 5 min. All error bars represent SD,  $n = 3$ . (A) Csy:F9 was pre-saturated with dsDNA<sub>SP</sub> and competed with unlabeled dsDNA<sub>NS</sub>. (B) Csy:F9 was pre-saturated with dsDNA<sub>NS</sub> and competed with unlabeled dsDNA<sub>SP</sub>. (C) Csy complex was pre-saturated with dsDNA<sub>SP</sub> and competed with unlabeled dsDNA<sub>SP</sub>.

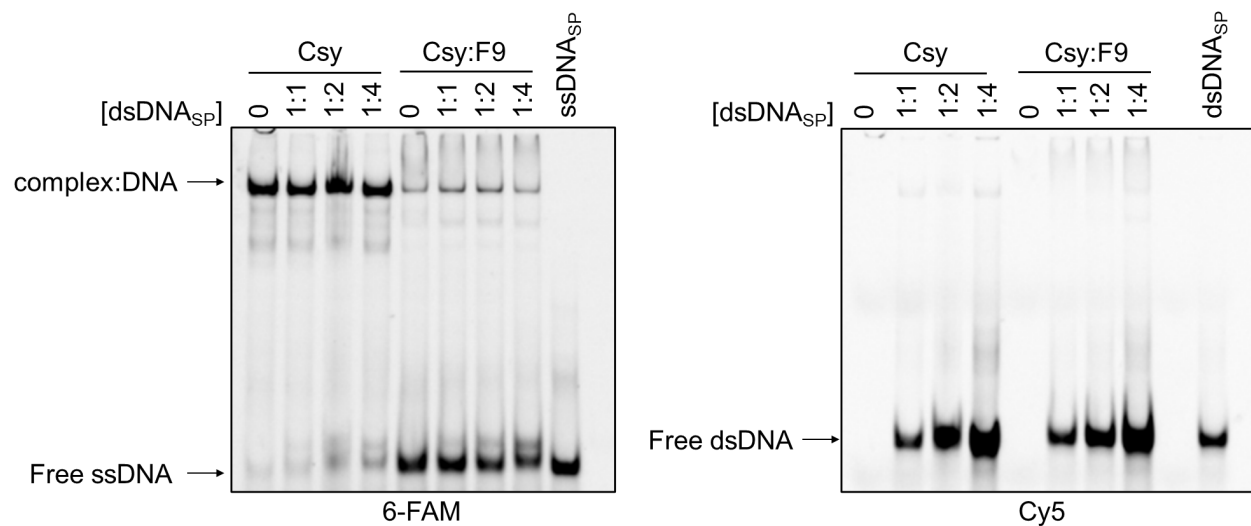

**Fig. S5.** Csy:F9 differentially interacts with dsDNA and ssDNA. Csy or Csy:F9 complexes (2000 nM) were pre-saturated with 1000 nM of 6-FAM labeled ssDNA<sub>SP</sub>, then increasing concentrations of Cy5-labeled dsDNA<sub>SP</sub> were added as competitor. DNA-binding was monitored by EMSA. The ratio of dsDNA<sub>SP</sub> to dsDNA<sub>NS</sub> is shown over each lane. The same gel was irradiated at 473 nm to visualize the 6-FAM-labeled DNA (left panel) and at 673 nm to visualize the Cy5-labeled DNA (right panel).

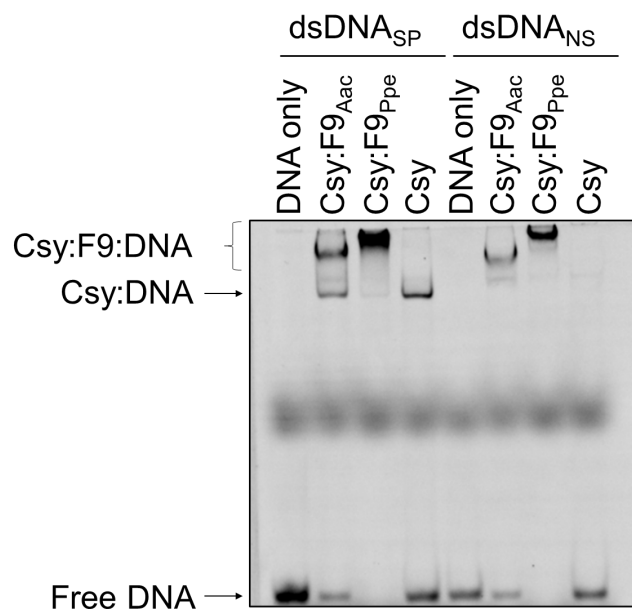

**Fig. S6.** Non-specific DNA binding is a conserved feature of AcrIF9 homologues. EMSA gels showing binding of Csy:F9<sub>Aac</sub>, Csy:F9<sub>Ppe</sub>, and Csy alone to Cy5-labeled  $dsDNA_{SP}$  and  $dsDNA_{NS}$ . These experiments were performed under identical conditions as those shown in Fig. 1A.

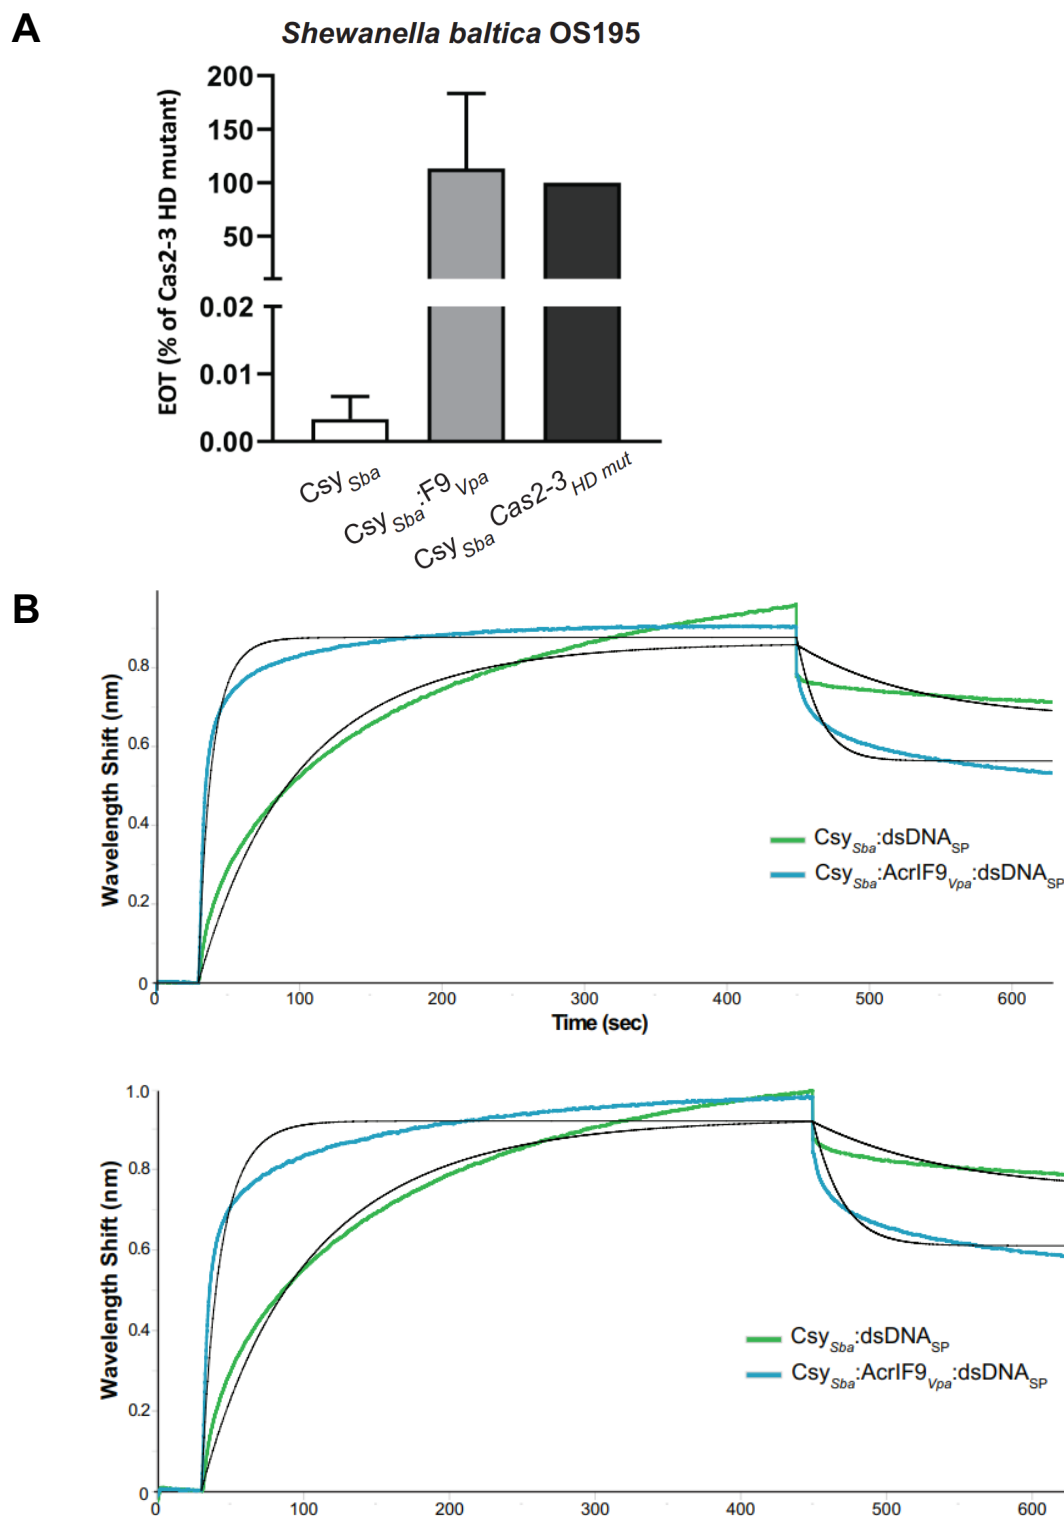

**Fig. S7.** AcrIF9 inhibits the Type I-F system of *S. baltica* (Csy<sub>Sba</sub>). (A) Efficiency of Transformation assays (EOTs) of the Csy<sub>Sba</sub> complex expressed in *E. coli* BL21-AI were performed. The activity of the effector complexes was tested when expressed alone (Csy<sub>Sba</sub>) or co-expressed with AcrIF9<sub>Vpa</sub>. EOT is equal to the colony ratio between the strain of interest and its corresponding Cas2-3 HD mutant strain, presented as percentages. Error bars represent the SEM, three replicates were quantified. (B) Independent BLI wavelength shifts (nm) generated by the binding Csy<sub>Sba</sub> to a specific dsDNA oligonucleotide, in the presence (blue) or absence (green) of AcrIF9<sub>Vpa</sub> are shown. Each experiment was performed with independently purified protein samples and freshly diluted oligonucleotide stocks. Non-linear regressions obtained by least-square fit by the BLItz Pro Software are shown in black for each curve.

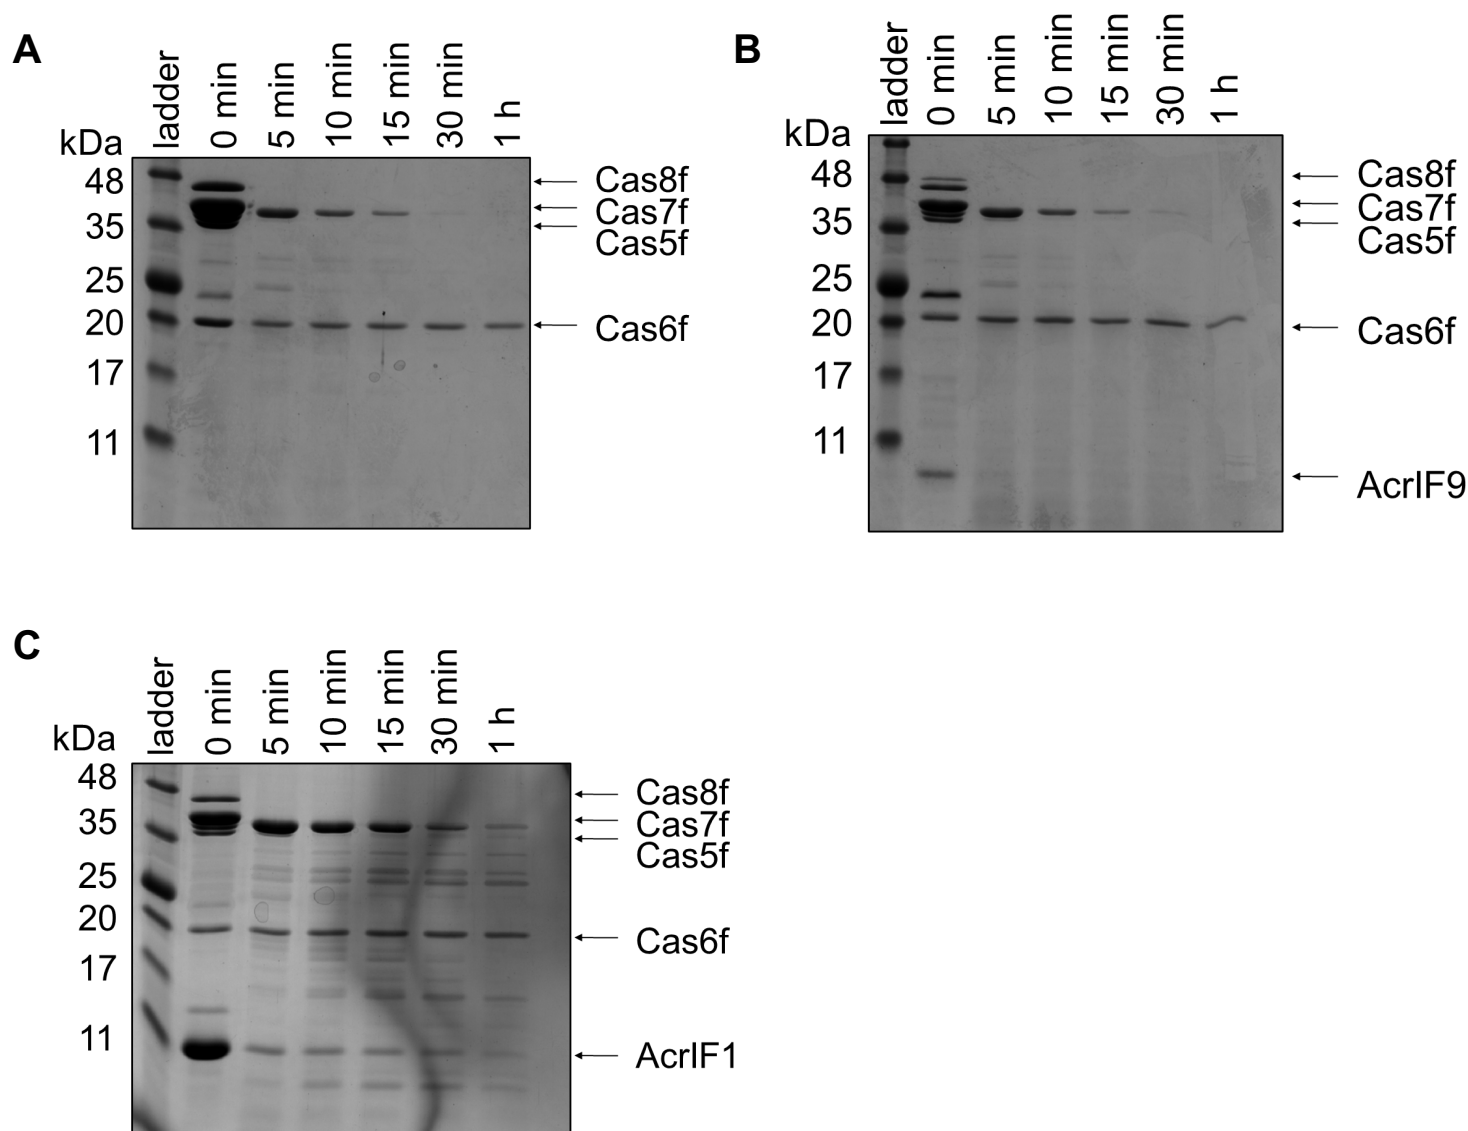

**Fig. S8.** AcrIF1 stabilizes Cas7f against proteolysis, while AcrIF9 does not. Csy (A), Csy:F9 (B), and Csy:F1 (C) complexes were treated with the protease, thermolysin, at 55 °C for various times. Coomassie Blue stained SDS polyacrylamide electrophoresis gels were analyzed to monitor the degradation the Csy subunits over time.
